# Supplementary material for: Natural transaminase fusions for biocatalysis
Source: Royal Society of Chemistry journal article supplement (doi:10.1039/d3ra07081f), 2024-01-01
Supplement: d3ra07081f1.pdf [file d3ra07081f1.pdf]

Supporting Information

**Natural transaminase fusions for biocatalysis**

Luba Prout,<sup>a</sup> Helen C. Hailes<sup>b</sup> and John M. Ward<sup>\*a</sup>

# Table of Contents

|                                                                                               |           |
|-----------------------------------------------------------------------------------------------|-----------|
| <b>Table of Contents</b> .....                                                                | <b>2</b>  |
| <b>Table of Tables</b> .....                                                                  | <b>3</b>  |
| <b>Table of Figures</b> .....                                                                 | <b>3</b>  |
| <b>1. Experimental</b> .....                                                                  | <b>4</b>  |
| 1.1 Bioinformatics .....                                                                      | 4         |
| 1.1.1 BLASTP of the <i>PpKTFusion</i> (1-959 aa) .....                                        | 4         |
| 1.1.2 Conserved domains .....                                                                 | 6         |
| 1.1.3 MSA .....                                                                               | 6         |
| 1.1.4 BLASTP of the <i>PpKTFusion</i> N- (1-526 aa) and C-terminal (527-959 aa) domains ..... | 6         |
| 1.1.5 <i>P. putida</i> KT2440 gene cluster analysis .....                                     | 8         |
| 1.1.6 Phylogenetic analysis .....                                                             | 8         |
| 1.1.7 Thermophilic homologs .....                                                             | 12        |
| 1.1.8 Residue conservation .....                                                              | 15        |
| 1.1.9 Structural homologs .....                                                               | 16        |
| 1.1.10 3D Models .....                                                                        | 20        |
| 1.1.11 Structural alignment .....                                                             | 21        |
| 1.2 Protein expression and purification .....                                                 | 22        |
| 1.2.1 Protein expression – general protocol .....                                             | 22        |
| 1.2.2 Lysate preparation by sonication .....                                                  | 22        |
| 1.2.3 Enzyme purification .....                                                               | 22        |
| 1.3 Enzyme assays .....                                                                       | 27        |
| 1.3.1 Colorimetric assays with purified enzymes .....                                         | 27        |
| 1.3.2 End-point assays .....                                                                  | 27        |
| 1.3.3 Thermostability assays .....                                                            | 29        |
| 1.4 Analytical HPLC .....                                                                     | 29        |
| 1.5 Kinetic parameters of <i>PpKTFusion/PpKTTAm</i> and <i>TfFusion/TfTAm</i> .....           | 30        |
| <b>2. Protein sequences</b> .....                                                             | <b>31</b> |
| 2.1 <i>Pseudomonas putida</i> KT2440 PP_2782 .....                                            | 31        |
| 2.1.1 <i>PpKTFusion</i> protein sequence .....                                                | 31        |
| 2.1.2 <i>PpKTTAm</i> protein sequence .....                                                   | 31        |
| 2.1.3 <i>PpKTDHR</i> protein sequence .....                                                   | 31        |
| 2.2 <i>Thermaerobacter marianensis</i> DSM 12885 Tmar_2123 .....                              | 32        |
| 2.2.1 <i>TmFusion</i> protein sequence .....                                                  | 32        |
| 2.2.2 <i>TmTAm</i> protein sequence .....                                                     | 32        |
| 2.2.3 <i>TmDHR</i> protein sequence .....                                                     | 32        |
| 2.3 <i>Thermaerobacter subterraneus</i> DSM 13965 ThesuDRAFT_00745 .....                      | 33        |
| 2.3.1 <i>TsFusion</i> protein sequence .....                                                  | 33        |
| 2.3.2 <i>TsTAm</i> protein sequence .....                                                     | 33        |
| 2.3.3 <i>TsDHR</i> protein sequence .....                                                     | 33        |
| 2.4 <i>Thermincola ferriacetica</i> Z-0001 Tfer_2018 .....                                    | 34        |
| 2.4.1 <i>TfFusion</i> protein sequence .....                                                  | 34        |
| 2.4.2 <i>TfTAm</i> protein sequence .....                                                     | 34        |
| 2.4.3 <i>TfDHR</i> protein sequence .....                                                     | 34        |
| <b>3. References</b> .....                                                                    | <b>35</b> |

## Table of Tables

|                                                                                                                                           |    |
|-------------------------------------------------------------------------------------------------------------------------------------------|----|
| Table S1. <i>PpKTFusion</i> BLASTP results summary. ....                                                                                  | 5  |
| Table S2. <i>PpKTFusion</i> conserved domain general function prediction by NCBI CD-Search. ....                                          | 6  |
| Table S3. <i>PpKTFusion</i> C-terminal domain BLASTP results summary. ....                                                                | 7  |
| Table S4. <i>PpKTFusion</i> KT2440 natural fusion OMA-identified orthologs with gene neighbourhood. ....                                  | 9  |
| Table S5. antiSMASH output for the selected thermophilic strains. ....                                                                    | 11 |
| Table S6. Thermophilic fusion sequence similarity results. ....                                                                           | 13 |
| Table S7. Thermophilic fusion conserved domain' general function prediction by NCBI CD-Search. ....                                       | 13 |
| Table S8. Thermophilic fusion BLASTP results summary. ....                                                                                | 14 |
| Table S9. <i>PpKTFusion</i> N- and C-terminal domain principal structural homologs. ....                                                  | 17 |
| Table S10. Thermophilic enzyme N-terminal domain principal structural homologs. ....                                                      | 18 |
| Table S11. Thermophilic enzyme C-terminal domain principal structural homologs. ....                                                      | 19 |
| Table S12. Results of <i>PpKTFusion</i> conserved residue mapping to AAR and thermophilic homologs through a 3D structure alignment. .... | 21 |

## Table of Figures

|                                                                                                                                   |    |
|-----------------------------------------------------------------------------------------------------------------------------------|----|
| Fig. S1. Phylogenetic tree showing all available <i>PpKTFusion</i> homologs with comparable gene clusters (as at January 2022). 8 |    |
| Fig. S2. <i>PpKTFusion</i> and thermophilic homolog' amino acid sequence alignment. ....                                          | 12 |
| Fig. S3. <i>PpKTFusion</i> residue conservation analysis. ....                                                                    | 15 |
| Fig. S4. 3D models of the <i>P. putida</i> KT2440 transaminase fusion and its thermophilic homologs. ....                         | 20 |
| Fig. S5. SDS-PAGE of <i>PpKTFusion</i> , <i>PpKTTAm</i> , and <i>PpKTDHR</i> expression, post-optimisation. ....                  | 23 |
| Fig. S6. SDS-PAGE gel of <i>TmFusion</i> , <i>TmTAm</i> , and <i>TmDHR</i> expression. ....                                       | 24 |
| Fig. S7. SDS-PAGE gel of <i>TsFusion</i> , <i>TsTAm</i> , and <i>TsDHR</i> expression. ....                                       | 25 |
| Fig. S8. SDS-PAGE gel of <i>TfFusion</i> , <i>TfTAm</i> , and <i>TfDHR</i> expression. ....                                       | 26 |
| Fig. S9. Typical 3-phenyl-1-propylamine HPLC standard curve used to determine product concentration in samples. ....              | 27 |
| Fig. S10. Colour intensity development in control samples. ....                                                                   | 28 |
| Fig. S11. Thermostability analysis of <i>TfFusion</i> . ....                                                                      | 29 |
| Fig. S12. Analytical HPLC method. ....                                                                                            | 29 |
| Fig. S13. Non-linear regression plots of <i>PpKTFusion/PpKTTAm</i> and <i>TfFusion/TfTAm</i> . ....                               | 30 |
| Fig. S14. <i>PpKTFusion</i> protein sequence. ....                                                                                | 31 |
| Fig. S15. <i>PpKTTAm</i> protein sequence. ....                                                                                   | 31 |
| Fig. S16. <i>PpKTDHR</i> protein sequence. ....                                                                                   | 31 |
| Fig. S17. <i>TmFusion</i> protein sequence. ....                                                                                  | 32 |
| Fig. S18. <i>TmTAm</i> protein sequence. ....                                                                                     | 32 |
| Fig. S19. <i>TmDHR</i> protein sequence. ....                                                                                     | 32 |
| Fig. S20. <i>TsFusion</i> protein sequence. ....                                                                                  | 33 |
| Fig. S21. <i>TsTAm</i> protein sequence. ....                                                                                     | 33 |
| Fig. S22. <i>TsDHR</i> protein sequence. ....                                                                                     | 33 |
| Fig. S23. <i>TfFusion</i> protein sequence. ....                                                                                  | 34 |
| Fig. S24. <i>TfTAm</i> protein sequence. ....                                                                                     | 34 |
| Fig. S25. <i>TfDHR</i> protein sequence. ....                                                                                     | 34 |

# 1. Experimental

## 1.1 Bioinformatics

### 1.1.1 BLASTP of the *PpKTFusion* (1-959 aa)

To search for natural fusion primary sequence homologs, an amino acid sequence of an enzyme was used as input for BLASTP (NCBI), accessible at <https://blast.ncbi.nlm.nih.gov/Blast.cgi?PAGE=Proteins>. Default parameters were used throughout, except for the maximum number of sequences, which was increased to 1000.

Homologs with >99% query cover (QC) and >72% ID were only found in species of *Pseudomonas* genus. These were class III PLP-dependent TAm enzymes with sequence lengths of 955 aa, 956 aa, and 959 aa. Sequences with 69-99% QC and 24-46% identity (ID) were identified in various genera – but predominantly in *Bacillus*, *Leptospira*, *Nocardia*, *Photorhabdus*, *Pseudomonas*, *Rhodococcus*, *Streptomyces*, and *Xenorhabdus* (**Table S1**). Entries with 21-71% QC and 24-44% ID were from various genera and were primarily between 400-600 aa in length and included enzymes classified as class III PLP-dependent TAm, notably acetylornithine, putrescine or succinyldiaminopimelate TAm, or hypothetical proteins.

**Table S1. PpKTFusion BLASTP results summary.**

| Number of sequences                                                        | Query cover | Identity | Genus and Species                                                                                                                                                                                                                                                                                                                                                                                                                                                                                                                                                                                                                                                                                                                                                                                                                                                                                                                                                                                                                                                                                                                                                                               |
|----------------------------------------------------------------------------|-------------|----------|-------------------------------------------------------------------------------------------------------------------------------------------------------------------------------------------------------------------------------------------------------------------------------------------------------------------------------------------------------------------------------------------------------------------------------------------------------------------------------------------------------------------------------------------------------------------------------------------------------------------------------------------------------------------------------------------------------------------------------------------------------------------------------------------------------------------------------------------------------------------------------------------------------------------------------------------------------------------------------------------------------------------------------------------------------------------------------------------------------------------------------------------------------------------------------------------------|
| <b>Tier 1</b>                                                              |             |          |                                                                                                                                                                                                                                                                                                                                                                                                                                                                                                                                                                                                                                                                                                                                                                                                                                                                                                                                                                                                                                                                                                                                                                                                 |
| 64<br>fusion-like <sup>a</sup>                                             | 99-100%     | 95-100%  | <i>Pseudomonas putida</i> group, <i>Pseudomonas</i> sp., including 43(2021) / B8(2017) / B14(2017) / C5pp / CFA / JY-Q / Leaf58 / NBRC 111118 / NBRC 111125 / SID14000 / SWI36 / SWRI50 / p21 / XWY-1, <i>Pseudomonas alloputida</i> , <i>Pseudomonas asiatica</i> , <i>Pseudomonas monteilii</i> , <i>Pseudomonas plecoglossicida</i> , <i>Pseudomonas taiwanensis</i> SJ9, <i>Pseudomonas tehranensis</i> , <i>Aeromonas caviae</i> *                                                                                                                                                                                                                                                                                                                                                                                                                                                                                                                                                                                                                                                                                                                                                         |
| 117<br>fusion-like <sup>a</sup>                                            | 99-100%     | 80-83%   | <i>Pseudomonas asgharzadehiana</i> , <i>Pseudomonas asplenii</i> , <i>Pseudomonas baetica</i> , <i>Pseudomonas bananamidigenes</i> , <i>Pseudomonas botevensis</i> , <i>Pseudomonas caspiana</i> , <i>Pseudomonas crudilactis</i> , <i>Pseudomonas ekonensis</i> , <i>Pseudomonas fluorescens</i> , <i>Pseudomonas glycinae</i> , <i>Pseudomonas jessenii</i> , <i>Pseudomonas koreensis</i> , <i>Pseudomonas leptonychotis</i> , <i>Pseudomonas mandelii</i> , <i>Pseudomonas marginalis</i> , <i>Pseudomonas mونسensis</i> , <i>Pseudomonas prosekii</i> , <i>Pseudomonas sivasensis</i> , <i>Pseudomonas</i> spp., including 22E 5 / 2822-17 / 31-12 / 31E 6 / 43NM1 / A-RE-26 / AD21 / B11(2017) / B14-6 / B15(2017) / B26(2017) / B28(2017) / B35(2017) / CFBP13506 / F01002 / FIT28 / FSL W5-0299 / GM / IAC-BECa141 / Irchel 3H9 / Irchel s3a12 / Irchel s3f10 / Irchel s3h9 / LG1E9 / MG-9 / MIACH / MSS86 / MWU318 / NIBRBAC000502773 / ok266 / PGPPP2 / R16(2017) / R84 / RIT357 / Root329 / RU47 / S49 / SC3(2021) / SCA2728.1_7 / SH10-3B / SJZ131 / SW-3, <i>Pseudomonas stutzeri</i> , <i>Pseudomonas tensinigenes</i> , <i>Pseudomonas viridiflava</i> , <i>Pseudomonas zeae</i> |
|                                                                            |             | 72-74%   | <i>Atopomonas hussainii</i> (formerly <i>Pseudomonas hussainii</i> ), <i>Pseudomonas leptonychotis</i> , <i>Pseudomonas</i> sp. CC6-YY-74 / OF001 / A-1 / MAHUQ-58 / SDI                                                                                                                                                                                                                                                                                                                                                                                                                                                                                                                                                                                                                                                                                                                                                                                                                                                                                                                                                                                                                        |
|                                                                            |             | 68%      | Unidentified <i>Gammaproteobacteria</i> bacterium                                                                                                                                                                                                                                                                                                                                                                                                                                                                                                                                                                                                                                                                                                                                                                                                                                                                                                                                                                                                                                                                                                                                               |
| <b>Tier 2</b>                                                              |             |          |                                                                                                                                                                                                                                                                                                                                                                                                                                                                                                                                                                                                                                                                                                                                                                                                                                                                                                                                                                                                                                                                                                                                                                                                 |
| 580<br>fusion- <sup>a</sup> or large<br>multi-domain- <sup>b</sup><br>like | 69-99%      | 24-46%   | various species, predominantly from <i>Bacillus</i> , <i>Deltaproteobacteria</i> , <i>Firmicutes</i> , <i>Gemmatimonadetes</i> , <i>Leptospira</i> , <i>Micromonospora</i> , <i>Nocardia</i> , <i>Photorhabdus</i> , <i>Planctomycetes</i> , <i>Pseudoalteromonas</i> , <i>Pseudomonas</i> , <i>Rhodococcus</i> , <i>Streptomyces</i> , <i>Syntrophomonadaceae</i> , and <i>Xenorhabdus</i> genera                                                                                                                                                                                                                                                                                                                                                                                                                                                                                                                                                                                                                                                                                                                                                                                              |
| <b>Tier 3</b>                                                              |             |          |                                                                                                                                                                                                                                                                                                                                                                                                                                                                                                                                                                                                                                                                                                                                                                                                                                                                                                                                                                                                                                                                                                                                                                                                 |
| 948<br>TAm-like <sup>c</sup>                                               | 21-71%      | 24-44%   | various species, predominantly from <i>Actinosynnema</i> , <i>Bacillus</i> , <i>Brevibacillus</i> , <i>Buttiauxella</i> , <i>Citrobacter</i> , <i>Cronobacter</i> , <i>Desulfotomaculum</i> , <i>Dickeya</i> , <i>Enterobacter</i> , <i>Enterobacteriaceae</i> , <i>Escherichia</i> , <i>Kitasatospora</i> , <i>Klebsiella</i> , <i>Mesorhizobium</i> , <i>Micromonospora</i> , <i>Ochrobactrum</i> , <i>Pectobacterium</i> , <i>Pseudomonas</i> , <i>Rhizobium</i> , <i>Rhodococcus</i> , <i>Saccharothrix</i> , <i>Shigella</i> , <i>Streptomyces</i> genera                                                                                                                                                                                                                                                                                                                                                                                                                                                                                                                                                                                                                                  |

<sup>a</sup> entries with sequence length ranging between 720-1200 aa

<sup>b</sup> entries with sequence length >1400 aa

<sup>c</sup> entries with sequence length ranging between 200-600 aa

\*more recent searches (performed for keeping up-to-date with the emerging new data) have now also identified a close homolog in *Aeromonas caviae*.

### 1.1.2 Conserved domains

Conserved domains within the *P. putida* transaminase fusion (*PpKTFusion*) were identified using NCBI CD-Search, accessible at <https://www.ncbi.nlm.nih.gov/Structure/cdd/wrpsb.cgi>.

**Table S2. *PpKTFusion* conserved domain general function prediction by NCBI CD-Search.**

| Enzyme                          | Conserved Domain                                                                             | aa region |
|---------------------------------|----------------------------------------------------------------------------------------------|-----------|
| <i>PpKTFusion</i><br>AAN68390.1 | AAT_I superfamily<br>PLP-dependent aspartate aminotransferase (fold type I)                  | 41-521    |
|                                 | COG5322 superfamily<br>Predicted amino acid dehydrogenase [general function prediction only] | 610-948   |

### 1.1.3 MSA

Multiple sequence alignments (MSA), comprised of natural fusion (or parts thereof) primary sequence homologs, were generated using ClustalOmega online tool (EMBL-EBI), accessible at <http://www.ebi.ac.uk/Tools/msa/clustalo/>. Protein sequence alignment results were visualised using Sequence Manipulation Suite, accessible at <https://www.bioinformatics.org/sms2/index.html>.

### 1.1.4 BLASTP of the *PpKTFusion* N- (1-526 aa) and C-terminal (527-959 aa) domains

Additional BLASTP analysis of the proposed N-terminal domain (1-526 aa) returned analogous results to that generated by *PpKTFusion* itself. In contrast, BLASTP results of the proposed C-terminal domain (527-959 aa) were more varied and included entries that were not returned by the *PpKTFusion* search (**Table S3**). Of these, over 200 entries were dehydrogenase-/reductase-like (including 123 shikimate/quinic 5-dehydrogenases, 18 semialdehyde dehydrogenases, 17 amino acid dehydrogenases, 4 glutamyl-tRNA reductases, and 3 long-chain acyl-carrier-protein reductases) with the sequence length ranging between 120-584 aa. All entries with the single functional motif aligned with the 551/561-959 aa region of *PpKTFusion* (results not shown).

**Table S3. PpKTFusion C-terminal domain BLASTP results summary.**

| Number of sequences                                                                                                                                                                                | Query cover | Identity | Genus and Species                                                                                                                                                                                                                                                                               |
|----------------------------------------------------------------------------------------------------------------------------------------------------------------------------------------------------|-------------|----------|-------------------------------------------------------------------------------------------------------------------------------------------------------------------------------------------------------------------------------------------------------------------------------------------------|
| <b>Tier 1</b>                                                                                                                                                                                      |             |          |                                                                                                                                                                                                                                                                                                 |
| 17<br>fusion-like <sup>a</sup>                                                                                                                                                                     | 99-100%     | 80-100%  | <i>Pseudomonas</i> , <i>Pseudomonas mandelii</i> , <i>Pseudomonas monteilii</i> , <i>Pseudomonas putida</i> , <i>Pseudomonas</i> sp. B11(2017) / B14(2017) / B15(2017) / B26(2017) / B28(2017) / B35(2017) / B8(2017) / MIACH / R16(2017)                                                       |
| <b>Tier 2</b>                                                                                                                                                                                      |             |          |                                                                                                                                                                                                                                                                                                 |
| 180<br>fusion- <sup>a</sup> or large multi-domain- <sup>b</sup> like                                                                                                                               | 66-99%      | 20-49%   | various species, predominantly from <i>Anaerolineae</i> , <i>Anaerolineales</i> , <i>Armatimonadetes</i> , <i>Chloroflexi</i> , <i>Firmicutes</i> , <i>Pseudomonas</i> and <i>Rhodococcus</i> genera                                                                                            |
| 364<br>dehydro-genase-like and other <sup>c</sup>                                                                                                                                                  | 52-94%      | 20-42%   | various species, predominantly from <i>Anaerolineaceae</i> , <i>Armatimonadetes</i> , <i>Caldanaerobacter</i> , <i>Cellulomonas</i> , <i>Desulfotomaculum</i> , <i>Moorella</i> , <i>Omnitrophica</i> , <i>Peptococcaceae</i> , <i>Thermoanaerobacter</i> , <i>Thermoanaerobacterium</i> genera |
| <b>Tier 3</b>                                                                                                                                                                                      |             |          |                                                                                                                                                                                                                                                                                                 |
| 8<br>fusion-like <sup>a</sup>                                                                                                                                                                      | 24-49%      | 27-32%   | predominantly from <i>Vibrio</i> genera                                                                                                                                                                                                                                                         |
| 25<br>dehydro-genase-like and other <sup>c</sup>                                                                                                                                                   | 9-44%       | 25-41%   | various                                                                                                                                                                                                                                                                                         |
| <sup>a</sup> entries with sequence length ranging between 680-980 aa<br><sup>b</sup> entries with sequence length >1500 aa<br><sup>c</sup> entries with sequence length ranging between 200-580 aa |             |          |                                                                                                                                                                                                                                                                                                 |

### 1.1.5 *P. putida* KT2440 gene cluster analysis

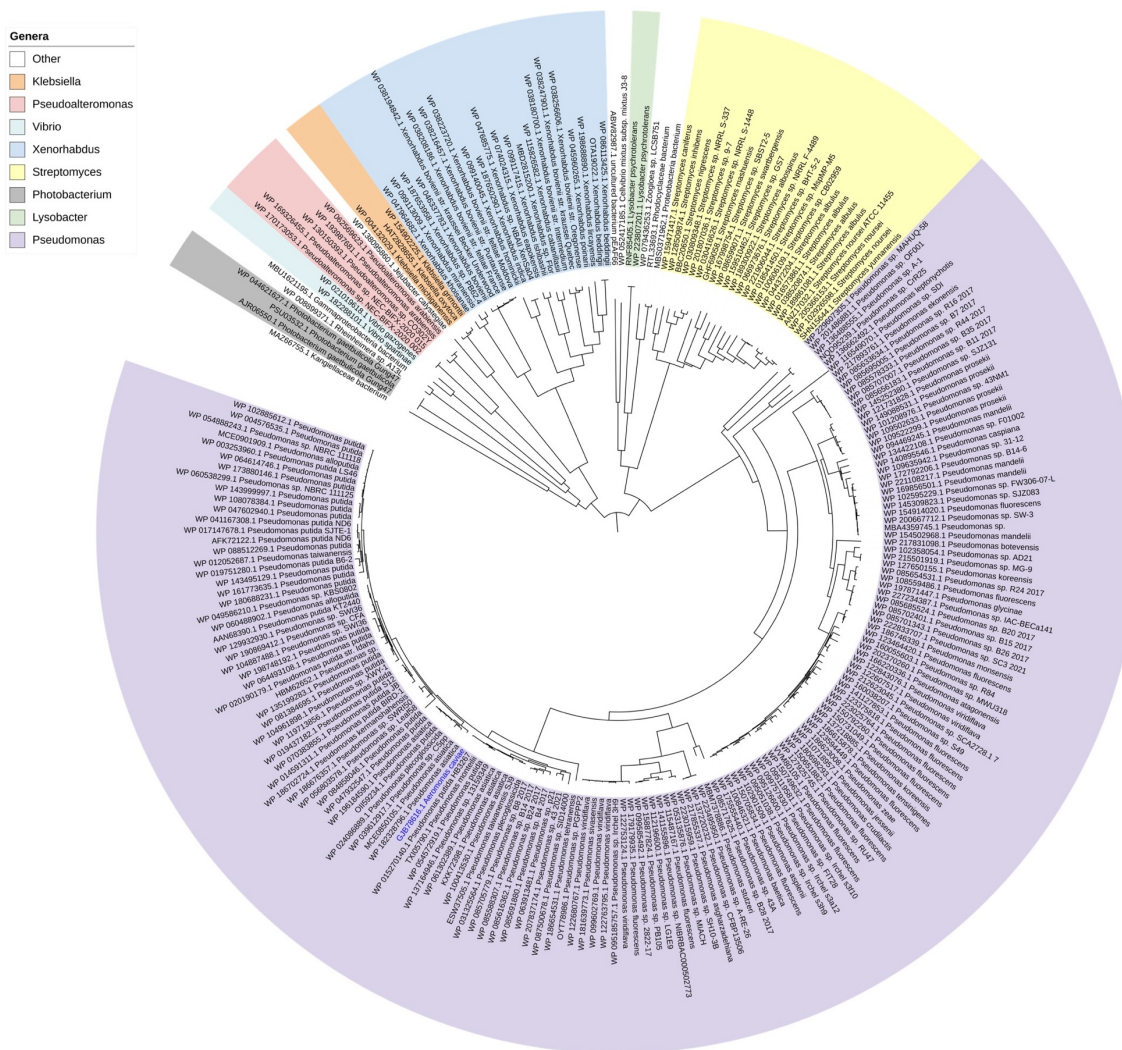

**Fig. S1. Phylogenetic tree showing all available *PpKTFusion* homologs with comparable gene clusters (as at January 2022). The tree was generated using <https://itol.embl.de/>.**

### 1.1.6 Phylogenetic analysis

*PpKTFusion* (PP\_2782), *TmFusion* (Tmar\_2123), *TsFusion* (ThesuDRAFT\_00745), and *TjfFusion* (Tfer\_2018) gene orthologs and local synteny were analysed using OMA (orthologous matrix) Browser, accessible at <https://omabrowser.org/>.



**Table S4. PpKTFusion KT2440 natural fusion OMA-identified orthologs with gene neighbourhood.**

| Organism / Gene neighbourhood <sup>a</sup>                                           | Ortholog<br>NCBI Reference | Organism Properties<br><i>Morphology:</i> Gram, shape, motility.<br><i>Environment:</i> physico-chemical properties,<br>oxygen, temp. | Seq.<br>length<br>(aa) | % ID |
|--------------------------------------------------------------------------------------|----------------------------|---------------------------------------------------------------------------------------------------------------------------------------|------------------------|------|
| 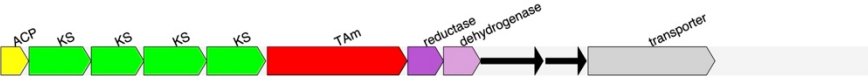   | AAN68390.1                 | Gram-negative, rod-shaped, motile, aerobic, mesophilic                                                                                | 959                    | ref  |
|    | WP_014591311.1             | Gram-negative, rod-shaped, motile, aerobic, mesophilic                                                                                | 956                    | 99%  |
|    | WP_012052687.1             | Gram-negative, rod-shaped, motile; non-halophilic, aerobic, mesophilic                                                                | 956                    | 98%  |
|    | WP_038520874.1             | Gram-positive, filamentous, nonmotile; aerobic, mesophilic                                                                            | 967                    | 45%  |
|    | WP_012998118.1             | Gram-positive, filamentous/tailed, motile; aerobic, mesophilic                                                                        | 910                    | 30%  |
|    | WP_052413620.1             | Gram-positive, spore-forming, aerobic, mesophilic                                                                                     | 906                    | 31%  |
|   | WP_011148476.1             | Gram-negative, rod-shaped, motile, facultative anaerobe, mesophilic                                                                   | 855                    | 25%  |
|  | WP_012776617.1             | Gram-negative, rod-shaped, nonmotile, facultative anaerobe, mesophilic                                                                | 855                    | 25%  |
|  | WP_012489320.1             | Gram-negative, rod-shaped, motile, aerobic, mesophilic                                                                                | 876                    | 26%  |

Table S4. Continued.

| Organism / Gene neighbourhood <sup>a</sup> | Ortholog<br>NCBI Reference    | Organism Properties<br><i>Morphology:</i> Gram, shape, motility.<br><i>Environment:</i> physico-chemical properties,<br>oxygen, temp. | Seq.<br>length<br>(aa) | % ID |
|--------------------------------------------|-------------------------------|---------------------------------------------------------------------------------------------------------------------------------------|------------------------|------|
|                                            | WP_012405496.1                | Gram-negative, rod-shaped, nonmotile,<br>non-halophilic, aerobic, mesophilic                                                          | 955                    | 29%  |
|                                            | WP_011639885.1                | Gram-negative, spirilla, nonmotile;<br>anaerobic, mesophilic                                                                          | 891                    | 30%  |
|                                            | WP_013176216.1                | Gram-positive, rod-shaped, nonmotile;<br>anaerobic, thermophilic                                                                      | 901                    | 31%  |
|                                            | WP_013120324.1                | Gram-positive, rod-shaped, nonmotile;<br>anaerobic, thermophilic                                                                      | 902                    | 29%  |
|                                            | ADU52204.1/<br>WP_013496504.1 | Gram-positive; Gram-negative at stationary<br>phase, rod-shaped, nonmotile; halophilic,<br>aerobic, hyperthermophilic                 | 981                    | 28%  |
|                                            | WP_011194901.1                | Gram-positive, rod-shaped, nonmotile;<br>non-halophilic, microaerophilic,<br>thermophilic                                             | 875                    | 30%  |
|                                            | WP_013138266.1                | Gram-positive, rod-shaped, nonmotile;<br>aerobic, mesophilic                                                                          | 894                    | 29%  |

  

▶ ACP-like protein     
 ▶ oxidoreductase / dehydrogenase family protein     
 ▶ hydrolase family protein     
 ▶ transcription regulator protein     
 ▶ hypothetical protein     
 ▶ thioesterase     
 ▶ methyltransferase  
▶ 3-oxoacyl-(ACP) synthase II-like protein / beta-ketoacyl synthase-like protein     
 ▶ PLP-dependent TAM     
 ▶ kinase     
 ▶ transport or membrane protein     
 ▶ other     
 ▶ cytochrome 450     
 ▶ RNA polymerase

ACP: acyl carrier protein; KS: 3-oxoacyl-ACP synthase/ $\beta$ -ketoacyl synthase; TAM: transaminase; transcr. reg.: transcription regulation enzyme; \*predicted; d.: domain; d.c.: domain-containing; fam.: family. Gene neighbourhood was visualised using a Python script ('GeneNBHD'), with ORF data pulled directly from NCBI.

**Table S5. antiSMASH output for the selected thermophilic strains.**

| Compound Type                                                                                                                                                                                                                                                                                                                                                                                                                                                 | Most similar known cluster                |                                                               | Known cluster product description                                                                                                        | Ref | Similarity % |
|---------------------------------------------------------------------------------------------------------------------------------------------------------------------------------------------------------------------------------------------------------------------------------------------------------------------------------------------------------------------------------------------------------------------------------------------------------------|-------------------------------------------|---------------------------------------------------------------|------------------------------------------------------------------------------------------------------------------------------------------|-----|--------------|
| <b><i>Thermaerobacter marianensis</i> DSM 12885</b>                                                                                                                                                                                                                                                                                                                                                                                                           |                                           |                                                               |                                                                                                                                          |     |              |
| saccharide <sup>a</sup>                                                                                                                                                                                                                                                                                                                                                                                                                                       | fengycin                                  | NRP                                                           | antimicrobial lipopeptide/fungicide                                                                                                      | 1   | 13%          |
| fatty acid <sup>b</sup>                                                                                                                                                                                                                                                                                                                                                                                                                                       | undecylprodigiosin                        | NRP + polyketide                                              | prodiginine family alkaloid with antifungal properties and potential antimalarial, anticancer, immunosuppressive and anti-algal activity | 2   | 9%           |
| saccharide <sup>a</sup>                                                                                                                                                                                                                                                                                                                                                                                                                                       | burkholderic acid                         | NRP + polyketide (modular type I)                             | a signalling molecule                                                                                                                    | 3   | 6%           |
| saccharide <sup>a</sup> (x5)                                                                                                                                                                                                                                                                                                                                                                                                                                  | none found                                |                                                               |                                                                                                                                          |     |              |
| <b><i>Thermaerobacter subterraneus</i> DSM 13965</b>                                                                                                                                                                                                                                                                                                                                                                                                          |                                           |                                                               |                                                                                                                                          |     |              |
| saccharide <sup>a</sup>                                                                                                                                                                                                                                                                                                                                                                                                                                       | fengycin                                  | NRP                                                           | see above                                                                                                                                | 1   | 13%          |
| fatty acid <sup>b</sup>                                                                                                                                                                                                                                                                                                                                                                                                                                       | undecylprodigiosin                        | NRP + polyketide                                              | see above                                                                                                                                | 2   | 9%           |
| saccharide <sup>a</sup> (x7)                                                                                                                                                                                                                                                                                                                                                                                                                                  | none found                                |                                                               |                                                                                                                                          |     |              |
| <b><i>Thermincola ferriacetica</i> Z-0001</b>                                                                                                                                                                                                                                                                                                                                                                                                                 |                                           |                                                               |                                                                                                                                          |     |              |
| saccharide <sup>a</sup>                                                                                                                                                                                                                                                                                                                                                                                                                                       | L-2-amino-4-methoxy-trans-3-butenoic acid | NRP                                                           | non-proteinogenic amino acid toxin with antibacterial and anticancer properties                                                          | 4,5 | 20%          |
| saccharide <sup>a</sup>                                                                                                                                                                                                                                                                                                                                                                                                                                       | S-layer glycan                            | saccharide                                                    | <i>G. stearothermophilus</i> cell surface protein polysaccharide                                                                         | 6   | 20%          |
| saccharide <sup>a</sup>                                                                                                                                                                                                                                                                                                                                                                                                                                       | legionaminic acid                         | other                                                         | an amine-containing monosaccharide (sialic acid analogue) present on the surface of bacterial pathogens                                  | 7   | 16%          |
| fatty acid <sup>b</sup>                                                                                                                                                                                                                                                                                                                                                                                                                                       | undecylprodigiosin                        | NRP + polyketide                                              | see above                                                                                                                                | 2   | 9%           |
| saccharide <sup>a</sup>                                                                                                                                                                                                                                                                                                                                                                                                                                       | paulomycin                                | other                                                         | glycosylated antibiotic                                                                                                                  | 8   | 3%           |
| cyclic-lactone-autoinducer <sup>c</sup>                                                                                                                                                                                                                                                                                                                                                                                                                       | 7-deoxypactamycin                         | polyketide (iterative type I) + saccharide (hybrid/tailoring) | antitumor antibiotic                                                                                                                     | 9   | 3%           |
| saccharide <sup>a</sup> (x7)                                                                                                                                                                                                                                                                                                                                                                                                                                  | none found                                |                                                               |                                                                                                                                          |     |              |
| cyclic-lactone-autoinducer <sup>c</sup>                                                                                                                                                                                                                                                                                                                                                                                                                       | none found                                |                                                               |                                                                                                                                          |     |              |
| β-lactone <sup>d</sup>                                                                                                                                                                                                                                                                                                                                                                                                                                        | none found                                |                                                               |                                                                                                                                          |     |              |
| ranthipeptide <sup>e</sup>                                                                                                                                                                                                                                                                                                                                                                                                                                    | none found                                |                                                               |                                                                                                                                          |     |              |
| halogenated <sup>f</sup>                                                                                                                                                                                                                                                                                                                                                                                                                                      | none found                                |                                                               |                                                                                                                                          |     |              |
| <sup>a</sup> saccharide cluster (likely from primary metabolism)<br><sup>b</sup> fatty acid cluster (likely from primary metabolism)<br><sup>c</sup> agrD-like cyclic lactone autoinducer peptide<br><sup>d</sup> beta-lactone (cyclic carboxylic ester) containing protease inhibitor<br><sup>e</sup> cysteine-rich / non-α thioether-containing RiPP peptide<br><sup>f</sup> cluster containing a halogenase (potentially generating a halogenated product) |                                           |                                                               |                                                                                                                                          |     |              |

### 1.1.7 Thermophilic homologs

|                  |                                                                                     |     |
|------------------|-------------------------------------------------------------------------------------|-----|
| PpKTFusion/1-959 | MTVMDYDRFVREKFKVGLLOALGLCEFEERALGSOLEFYRNPKGDMVTVTDFLGGYGAALFCHNDPOFVDQLCALLRSDVVF  | 80  |
| TmFusion/1-981   | M--HPFRQYVNPHLGELLEQIQMDKRVVRGQCWLWDED---GRRYLDVVAAYGALPFQFNPEIWAALAEARRQGBES       | 74  |
| TsFusion/1-886   | M--HPFRQYVNPHLAELLEQIQMDKRVVRGQCWLWDDQ---GRRYLDVVAAYGALPFQFNPEIWAALAEARRHGBES       | 74  |
| TfFusion/1-902   | ---MKFSSINPTMDKLFECFKLDVAIVKGGCTVLYLDOA---GNKYLDVLAQYGAWPFQYNNPELVAAAKKYFDLSLES     | 72  |
| PpKTFusion/1-959 | NAQMSIRGAAAGOLGRAISDAFNRELKNTERYISTPSNSGAEAVEIAVKHAEFRRQKSLQKQFDDIDFTLASLTASEHAYR   | 160 |
| TmFusion/1-981   | FTQPSFLNAAAGELARRLIEVA-PPG---LRYVTFANSNGAEAVEAAIKLARA-----A-----                    | 122 |
| TsFusion/1-886   | FVQPSFLNAAAGELARRLIEVA-PPG---LRYVTFANSNGAEAVEAAIKLARA-----A-----                    | 122 |
| TfFusion/1-902   | MYQPSIPVKAVELAEMLLQLA-PGE---MAQATPCOSGAEAVEVAIKLARS-----T-----                      | 120 |
| PpKTFusion/1-959 | ELDVAIDLDPAGVLPATLNSVTLRQVVEAVRQHNLAQHLTEVVFVALRGSFHGKLVNTVQLTYGRQWRAPARFCLNVVF     | 240 |
| TmFusion/1-981   | -----T-----GRPRILSTENAFHGKTFGALSATHRAAYQDVRFAPAEGFDK                                | 164 |
| TsFusion/1-886   | -----T-----GRPRILSTDNGFHGKTFGALSATHRAAYQDAVRFAPAEGFDK                               | 164 |
| TfFusion/1-902   | -----T-----GKPKILSTKNSFHGKTMGALSATGRDVMQKPFPTPGFEH                                  | 162 |
| PpKTFusion/1-959 | HDPOPHOLOQLP--ARHTHHWLSLQWDGHEHLHLVQLPFSAITAVLMEPIQEGGGINEFAAEYVLGRKLCNEQQCPV       | 318 |
| TmFusion/1-981   | VPYGDVAALEQALAA-----RPGEYAAFTVEPIQEGGGIVVPPPGYLRAAREICRRHGVLEIV                     | 222 |
| TsFusion/1-886   | VPYGDLEALERALAA-----RPGEYAAFTVEPIQEGGGIVVPPPGYLREAREVCCRHHGVLEIV                    | 222 |
| TfFusion/1-902   | HPFGDLDMLENKMRT-----EGKQIAAFTVEPIQEGGGIVVPPPEGYLKNAEIIICRKYGVLLAV                   | 220 |
| PpKTFusion/1-959 | DEVQSGFGRAGTFIASSQFNQGDYYCLSKALGGGLMKIAATVIRSSHVEGEFSYIHSSTFAEDPSCHIALSARRRIFA      | 398 |
| TmFusion/1-981   | DEVQVCLGRITGALFACQAEVTPDAMTLAKALGGGLMPCAVLCTEEVTEEFATKHSSTFAGNLAGRAGLAADLLTR        | 302 |
| TsFusion/1-886   | DEVQVCLGRITGALFACQAEVTPDAITLAKALGGGLMPCAVLCTEEVTEEFATKHSSTFAGNLAGRAGLAADLLTR        | 302 |
| TfFusion/1-902   | DEIQVCLGRITGALFACDREGVEPDIILLLSKALGGGLVPLGAVLSTROA--NEEFGRILHSSTFANNFTCAIELAVINKLLE | 300 |
| PpKTFusion/1-959 | DDDAMIKDTRTKGAYLKASLNEIKMAYEDVIAVVRGRGLLVGLELHDLVSV---SSSLVQASAOYNDALGYLIAGYLLQF    | 474 |
| TmFusion/1-981   | DDQALVRHVAETGEYLRQGLLATQRRHPRVIREVRCRGEFMLGLQFVTRTEFPF---NLLGVMGEQELTPTVIASVYLLNV   | 379 |
| TsFusion/1-886   | DDQALVRHVAETGEYLRQGLLATQRRHPRVIREVRCRGEFMLGLQFVDRFAFPF---NLLGVMGEQELTPTVIASVYLLNV   | 379 |
| TfFusion/1-902   | NGRQLINNAKSAENYLLKNELEDINROYEGVITKEIRGRCLMLGLEFNEFDG-SES---FSMKYLAEQCFSPILLAGYLLNV  | 376 |
| PpKTFusion/1-959 | EALRVAPSNSNVIRLEPPACTITLGETDKLTAALQRVCDMRRGDALPFAAGFCADSMPP--ALPARQDDFRVTE----      | 547 |
| TmFusion/1-981   | EGLRVAPTNGADVIRIEPPIIATREECQDYALAAATERVVDLIDREDTAGLRLHIVGQGRVGDQ--RHGATSPDHGMNGRS   | 457 |
| TsFusion/1-886   | EGLRVAPTNGADVIRIEPPIIATREECQDYALAAATERVVELIDRDDTAALLRHLVSEDAATGQ--AV-----           | 444 |
| TfFusion/1-902   | HKVVRVAPLNNPMTLRLQPSLTVATVEIDRALHGLERLVKALYYQDHCELYSYIIGKE--PGP--IRDRFSE-----       | 444 |
| PpKTFusion/1-959 | -----P-----VENRDAKVEVVARVAFINH                                                      | 567 |
| TmFusion/1-981   | AAIGRVVVGRSGTGVTRDGDGASRRATGAGELPATGRGGQVGTGTVHGGASQTPAAGSSREPATSPDDPAEGRFAFLVH     | 537 |
| TsFusion/1-886   | -----DR-----PAR-----H-QPALLAVRSREPEEAVAPSGDPREGRFAPFLVH                             | 482 |
| TfFusion/1-902   | -----KAVTGSSELLPEEKPTKFAFLIH                                                        | 468 |
| PpKTFusion/1-959 | LIDAILLGDVDPISLAALSPEQKRTFINRTPKE--RRAVFVGPVITRSRLGMAVEFTLYP-CMDSDAMAEYIRSGDLSIR    | 645 |
| TmFusion/1-981   | PVDLENYPEFDPGLAAFTREELADLAGRWNL--LKPFRIGQTRVSTCGRCTAYGEFYVVPRTADEFLAMP---AQEA-V     | 611 |
| TsFusion/1-886   | PVDLENYPEFDPGLAAFSRAELELAGRWNL--LKPFRIGQTRVSAACATAYGEFYVVPRTADEFLAMP---QABA-V       | 556 |
| TfFusion/1-902   | YPSSDVIKNNBSFKKASKDILEKLDWEASLDAEPEVIVHLPATKSKACKIPEGWLIQPYSGRHHMEMPP---RKDA-V      | 544 |
| PpKTFusion/1-959 | EBVGRVTDARADCCSITAGLGMYSITVNNCQALKIADMALTSGNALTIQMGLEALEQGCVCQCLALCEQTAAVVGAAGN     | 725 |
| TmFusion/1-981   | AAVKEALDLARDGGARTVGLGAYTSVVRGGLHLRDAGVALTTGNSFTVAAAVEALDEATRRLGFPLAESTVAVVGATGA     | 691 |
| TsFusion/1-886   | AETEEALELARENGARTVGLGAYTSVVRGGLHLRDAGVALTTGNSFTVAAAVEALAEASRRLGFPLQGTAVAVVGATGA     | 636 |
| TfFusion/1-902   | KVLVVALDKAKALGARTVGLGAYTSVVSRRGSDLQKGIATVSGNSYTIATAPDALIEGARLMIDPAESTGCVICATGS      | 624 |
| PpKTFusion/1-959 | VASTYASVLSATVDHLILIGSGRDGS--VRRLEKTAQOIIYADAARSILKGTAEHDRLAQRLLTLDG---FRG-----      | 792 |
| TmFusion/1-981   | ICRATALLGPRVORLLIIGNPARPEQSRRRLRVAGEICRHLVLSAGRP--S-----PVGRAG--RVDDGDRDQE          | 758 |
| TsFusion/1-886   | ICRATALLGAGEVRRLLIIGNPARPEQSRRRLRVAAADLAREVLSLAASG--R-----PVGRAG--RVDDGDRDQE        | 687 |
| TfFusion/1-902   | ICRVQAILLAELDKLVLCNPEKEKTSLRMEQADEITYTRAFREILAYKKG-----VAKIKGIKWLKGFIDRRKK          | 697 |
| PpKTFusion/1-959 | -----LLHSHCO-----KADLG--LHIARLV--DERLGNANAFITVTDNL-DATKGARIVL                       | 837 |
| TmFusion/1-981   | NHGAPLGGSGAAFFNFRGTAEAGELAPLAAQLDFGWPVNADAPVEEFVRRLETWMMARGCPLVITDLDAMLPQADVVV      | 838 |
| TsFusion/1-886   | -----PLGPLAQVVEFGWPDPAEPAEAFLEAWLAAGRCPLVITDLDAMLPQADVVV                            | 744 |
| TfFusion/1-902   | DDP-----EV---WNKLLTAL-ENQGFISINGYIHENLAAGKYSNPPKLLTVNLIKQALLQSDLLI                  | 753 |
| PpKTFusion/1-959 | CAANAPQPPFGAEHFAERSVICDIAVPLNVHQDLPQSRQEDVLYMHGGIVQTEPDDGLAPNVRAVLYKQCQYACMAESVLM   | 917 |
| TmFusion/1-981   | TATSSTAHLVTPGNVKGAVVCDLSRPPNVSVREVRDAREPDLVIDGGVIEVGRPS--LGWNFGFERGLVYACMAEIMIL     | 916 |
| TsFusion/1-886   | TATSSTAHLVTPRNKFGAVVCDLSRPPNVSVREVGAREPDLVIDGGVIEVGRPS--MGWNFGFERGLVYACMAEIMML      | 822 |
| TfFusion/1-902   | SASNSTNHLGPGHLKPGSVICDVARPEPVSSEAVLEQRKQDLVIEGGLVQYEDDIC--FGQNMGYEPQVNMACLSEIMLL    | 831 |
| PpKTFusion/1-959 | GLSGMSQHGSGYGD-LSREOVQVRAALATHGFTLAQFKTONSL-----                                    | 959 |
| TmFusion/1-981   | ALEHHYQHTSLGADLNLETLLWLEELARKHGFRLLAQLRSFDRPLPDEAWERLVAARSVAVLGSAAAR-----           | 981 |
| TsFusion/1-886   | ALEHHYRHTSLGADLNLETLLWLDLARQHGFRLLAELRSFDRPLPAEAWERVLAARSALG-TAAR-----              | 886 |
| TfFusion/1-902   | ALEGTYRDFSIGLKIIPVENVYVYRELARQHGKGLATPWNNKGGVTEPVARMIKEAALKNE-NVEKIKTPKSS           | 902 |

**Fig. S2. PpKTFusion and thermophilic homolog' amino acid sequence alignment.** Residues highlighted in black are identical in all sequences. Residues highlighted in grey are synonymous. Red and blue squares show the implied boundaries of the N- and C-terminal domains, respectively, with the sequence in between proposed as the linker peptide. PpKTFusion N-terminal domain boundary was based on the sequence alignment at the time.

**Table S6. Thermophilic fusion sequence similarity results.**

| Homolog          | Organism                                      | Seq. Length | Query cover | Identity |
|------------------|-----------------------------------------------|-------------|-------------|----------|
| <i>TmFusion</i>  | <i>Thermaerobacter marianensis</i> DSM 12885  | 981         | ref         | ref      |
| <i>TsFusion</i>  | <i>Thermaerobacter subterraneus</i> DSM 13965 | 886         | 92%         | 93%      |
| <i>TjfFusion</i> | <i>Thermincola ferriacetica</i> Z-0001        | 902         | 87%         | 49%      |

Analysis was performed using BLASTP.

**Table S7. Thermophilic fusion conserved domain' general function prediction by NCBI CD-Search.**

| Enzyme                         | Conserved Domain                                                                                                  | aa region |
|--------------------------------|-------------------------------------------------------------------------------------------------------------------|-----------|
| <i>TmFusion</i><br>ADU52204.1  | ArgD<br>acetylornithine/succinyldiaminopimelate/putrescine aminotransferase [amino acid transport and metabolism] | 22-419    |
|                                | COG5322 superfamily<br>Predicted amino acid dehydrogenase [general function prediction only]                      | 579-949   |
| <i>TsFusion</i><br>EKP95021.1  | ArgD<br>Acetylornithine/succinyldiaminopimelate/putrescine aminotransferase [amino acid transport and metabolism] | 22-419    |
|                                | COG5322 superfamily<br>Predicted amino acid dehydrogenase [General function prediction only]                      | 468-855   |
| <i>TjfFusion</i><br>KNZ69380.1 | ArgD<br>Acetylornithine/succinyldiaminopimelate/putrescine aminotransferase [amino acid transport and metabolism] | 1-418     |
|                                | COG5322 superfamily<br>Predicted amino acid dehydrogenase [General function prediction only]                      | 513-864   |

**Table S8. Thermophilic fusion BLASTP results summary.**

| Number of sequences                                                                                                                                                                                                                                            | Query cover | Identity | Genus and Species                                                                                                                                                                                                                                                                                                                         |
|----------------------------------------------------------------------------------------------------------------------------------------------------------------------------------------------------------------------------------------------------------------|-------------|----------|-------------------------------------------------------------------------------------------------------------------------------------------------------------------------------------------------------------------------------------------------------------------------------------------------------------------------------------------|
| <b><u>Tier 1 TmFusion</u></b>                                                                                                                                                                                                                                  |             |          |                                                                                                                                                                                                                                                                                                                                           |
| 10<br>fusion-like <sup>a</sup>                                                                                                                                                                                                                                 | 91-100%     | 71-100%  | <i>Thermaerobacter</i> sp. PB12/4term, <i>Thermaerobacter subterraneus</i> , <i>Firmicutes bacterium</i> , <i>Symbiobacterium terraclitae</i> , <i>Symbiobacterium thermophilum</i> IAM 14863, <i>Thermaerobacter</i> sp. FW80                                                                                                            |
| <b><u>Tier 1 TsFusion</u></b>                                                                                                                                                                                                                                  |             |          |                                                                                                                                                                                                                                                                                                                                           |
| 4<br>fusion-like <sup>a</sup>                                                                                                                                                                                                                                  | 97-99%      | 77-100%  | <i>Thermaerobacter</i> sp. PB12/4term, <i>Thermaerobacter marianensis</i> , <i>Thermaerobacter</i> sp. FW80, <i>Firmicutes bacterium</i>                                                                                                                                                                                                  |
| <b><u>Tier 1 TfFusion</u></b>                                                                                                                                                                                                                                  |             |          |                                                                                                                                                                                                                                                                                                                                           |
| 1<br>fusion-like <sup>a</sup>                                                                                                                                                                                                                                  | 100%        | 95-100%  | <i>Thermincola potens</i>                                                                                                                                                                                                                                                                                                                 |
| <b><u>Tier 2 TmFusion / TsFusion / TfFusion (shared)<sup>†</sup></u></b>                                                                                                                                                                                       |             |          |                                                                                                                                                                                                                                                                                                                                           |
| 500-600<br>predominantly<br>fusion-like <sup>a</sup>                                                                                                                                                                                                           | 71-99%      | 28-69%   | various species, predominantly from <i>Alkalihalobacillus</i> , <i>Firmicutes</i> , <i>Paraburkholderia</i> , <i>Pseudomonas</i> , <i>Rhodococcus</i> , <i>Streptomyces</i> , and <i>Syntrophomonadaceae</i> genera                                                                                                                       |
| <b><u>Tier 3 TmFusion / TsFusion / TfFusion (shared)<sup>†</sup></u></b>                                                                                                                                                                                       |             |          |                                                                                                                                                                                                                                                                                                                                           |
| 400-480<br>predominantly<br>TAm-like <sup>b</sup>                                                                                                                                                                                                              | 41-70%      | 37-67%   | various species, predominantly from <i>Acidaminococcaceae</i> , <i>Alkaliphilus</i> , <i>Armatimonadetes</i> , <i>Clostridia</i> , <i>Firmicutes</i> , <i>Moorella</i> , <i>Pelotomaculum</i> , <i>Peptococcaceae</i> , <i>Syntrophomonadaceae</i> , <i>Thermoanaerobacter</i> , <i>Thermoanaerobacterium</i> , and <i>Thermus</i> genera |
| 5-20<br>TAm-like <sup>b</sup>                                                                                                                                                                                                                                  | 24-40%      | 41-70%   | predominantly from <i>Firmicutes</i>                                                                                                                                                                                                                                                                                                      |
| <sup>†</sup> shared entries represent entries that were returned for all three thermophilic fusions by BLASTP<br><sup>a</sup> entries with sequence length ranging between 650-1100 aa<br><sup>b</sup> entries with sequence length ranging between 400-600 aa |             |          |                                                                                                                                                                                                                                                                                                                                           |

### 1.1.8 Residue conservation

Protein residue conservation analysis in MSA was performed using Jensen–Shannon divergence scoring method<sup>10</sup> (Department of Computer Science and Lewis-Sigler Institute for Integrative Genomics, Princeton University, USA), employing an online server accessible at <http://compbio.cs.princeton.edu/conservation/score.html>.

Where the enzyme has not been previously characterised, conservation analysis is particularly useful for their activity and mutagenesis studies.

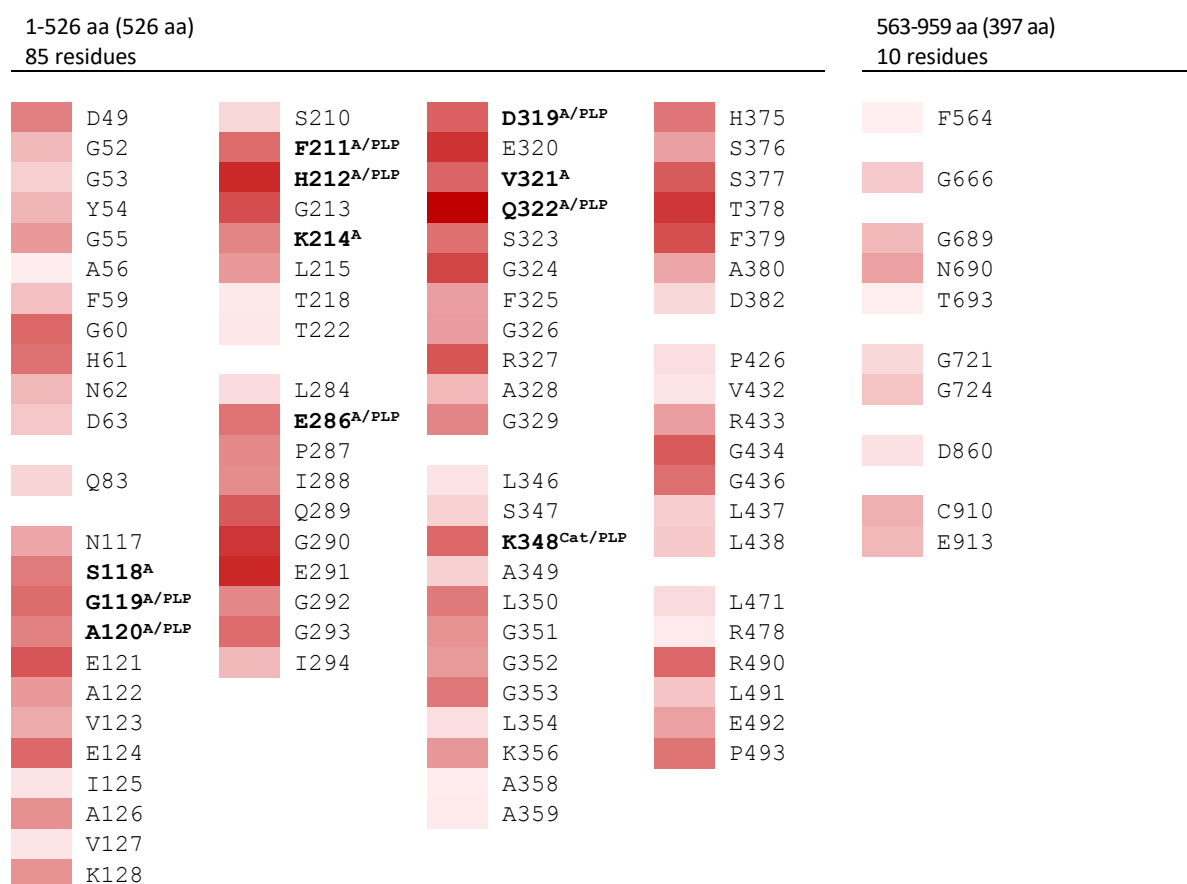

**Fig. S3. *PpKTFusion* residue conservation analysis.** Heatmap of *PpKTFusion* residues with top 10% conservation scores. A MSA, composed of a total of 359 homologs, was used as input. Darker colour indicates greater residue conservation. Residues in bold indicate predicted active site ('A') and PLP-binding regions ('PLP'), and the catalytic residue ('Cat') (in line with AAN68390.1 NCBI entry for the enzyme). Protein residue conservation analysis in MSA was performed using Jensen–Shannon Divergence scoring method,<sup>10</sup> employing an online server accessible at <http://compbio.cs.princeton.edu/conservation/score.html>. Jensen–Shannon Divergence (JSD) method determines the probability of each residue logarithmically, by evaluating sequentially neighbouring sites and comparing distribution of residues in individual sequences to that of the entire MSA.<sup>11</sup>

### 1.1.9 Structural homologs

To identify structural homologs or to predict protein structure (where those were not available), Phyre2<sup>12</sup> online protein fold recognition server (Structural Bioinformatics Group, Imperial College, London), accessible at <http://www.sbg.bio.ic.ac.uk/phyre2/>, was employed. AlphaFold<sup>13,14</sup> (developed by DeepMind and EMBL-EBI), accessible at <https://alphafold.ebi.ac.uk>, was used to generate the final putative 3D protein structures. Predicted protein 3D structures were aligned with available 3D structures, using PyMOL Molecular Graphics System (Schrödinger LLC).



**Table S9. PpKTFusion N- and C-terminal domain principal structural homologs.**

| Structural Homolog                                                                                      | Organism                                                            | PDB ID (chain)       | EC number <sup>a</sup> | Query aligned residues / coverage (%) | Seq. ID (%) |
|---------------------------------------------------------------------------------------------------------|---------------------------------------------------------------------|----------------------|------------------------|---------------------------------------|-------------|
| <u>PpKTFusion N-terminal domain: 1-526 aa (526 aa)</u>                                                  |                                                                     |                      |                        |                                       |             |
| class-III aminotransferase, CrmG (523 aa)                                                               | <i>Actinoboloteichus</i> sp. WH1-2216-6                             | 5DDW(D) <sup>b</sup> | 2.6.1                  | 9-524 (97%)                           | 35%         |
| putrescine aminotransferase, YgjG-protein a-zpa963-calmodulin complex (499 aa)                          | <i>Escherichia coli</i>                                             | 5H7D(I) <sup>c</sup> | 2.6.1.29, 2.6.1.82     | 2-519 (98%)                           | 28%         |
| bifunctional diaminopelargonic acid aminotransferase and dethiobiotin synthetase, DAPA AT-DTBS (831 aa) | <i>Arabidopsis thaliana</i>                                         | 4A0R(B)              | 2.6.1.62; 6.3.3.3      | 1-515 (97%)                           | 21%         |
| adenosylmethionine-8-amino-7-oxononanoate aminotransferase, DAPA AT (452 aa)                            | <i>Bacillus anthracis</i>                                           | 3N5M(D)              | 2.6.1.62               | 24-516 (93%)                          | 23%         |
| class-III aminotransferase (458 aa)                                                                     | <i>Ruegeria</i> sp. TM1040 (formerly <i>Silicibacter</i> )          | 3FCR(A)              | 2.6.1                  | 1-516 (97%)                           | 21%         |
| class-III aminotransferase (472 aa)                                                                     | <i>Ruegeria pomeroyi</i> (formerly <i>Silicibacter</i> )            | 3HMU(A)              | 2.6.1                  | 1-518 (98%)                           | 18%         |
| omega-transaminase, CvTAm (459 aa)                                                                      | <i>Chromobacterium violaceum</i>                                    | 4A6T(A)              | 2.6.1.18; 2.6.1.62     | 5-518 (97%)                           | 19%         |
| <u>PpKTFusion C-terminal domain: 527-959 aa (433 aa)</u>                                                |                                                                     |                      |                        |                                       |             |
| long-chain acyl-[acyl-carrier-protein] reductase, AAR (341 aa)                                          | <i>Synechococcus elongatus</i> PCC 7942 = FACHB-805 (cyanobacteria) | 6JZU(A) <sup>d</sup> | 1.2.1.80               | 562-953 (90%)                         | 25%         |
| glutamyl-tRNA reductase, GluTR (404 aa)                                                                 | <i>Methanopyrus kandleri</i>                                        | 1GPJ(A)              | 1.2.1.70               | 612-853 (59%) / 658-852 (48%)         | 29% / 32%   |
| glutamyl-tRNA reductase, GluTR (472 aa)                                                                 | <i>Arabidopsis thaliana</i>                                         | 4N7R(B)              | 1.2.1.70               | 614-852 (59%)                         | 22%         |
| N-((2S)-2-amino-2-carboxyethyl)-L-glutamate dehydrogenase, SbnB (339 aa)                                | <i>Staphylococcus aureus</i>                                        | 4MP6(A)              | 1.5.1.51               | 655-917 (65%)                         | 12%         |
| glutamyl-tRNA reductase, GluTR (144 aa)                                                                 | <i>Thermoplasma volcanium</i>                                       | 3OJO(A)              | 1.2.1.70               | 664-841 (43%)                         | 16%         |

<sup>a</sup> EC 2.6.1: transaminases; 2.6.1.18:  $\beta$ -alanine-pyruvate transaminase; EC 2.6.1.29: diamine transaminase; EC 2.6.1.62: adenosylmethionine-8-amino-7-oxononanoate transaminase; EC 2.6.1.82: putrescine-2-oxoglutarate transaminase; EC 6.3.3.3: dethiobiotin synthase (a cyclo-ligase – forms carbon-nitrogen bonds); EC 1.2.1.70: glutamyl-tRNA reductase (an oxidoreductase that acts on the aldehyde or oxo group using NADP<sup>+</sup>); EC 1.2.1.80: long-chain / fatty acid acyl-[acyl-carrier-protein] reductase (an oxidoreductase that acts on the aldehyde or oxo group using NAD(P)<sup>+</sup>); EC 1.5.1.51: N-((2S)-2-amino-2-carboxyethyl)-L-glutamate dehydrogenase (an oxidoreductase that acts on CH-NH group using NAD<sup>+</sup>).

<sup>b</sup> released in August 2016 but omitted by search algorithms until 2019. <sup>c</sup> released in June 2017. <sup>d</sup> released in April 2020.

Secondary structure and fold homology were predicted with >99% confidence over the aligned regions for all homologs. Structural homologs of the PpKTFusion full sequence were analogous to that returned by the PpKTFusion N-terminal domain (1-526 aa). The search did not find structural homologs for the entire PpKTFusion sequence, meaning that, at the time of the analysis, there were no solved structures available for such fusion enzymes in the PDB database.

**Table S10. Thermophilic enzyme N-terminal domain principal structural homologs.**

| Structural Homolog                                                                                                                  | Organism                                 | PDB ID (chain)       | EC number <sup>a</sup> | Aligned residues / coverage (%)                                                     | Seq. ID (%)       |
|-------------------------------------------------------------------------------------------------------------------------------------|------------------------------------------|----------------------|------------------------|-------------------------------------------------------------------------------------|-------------------|
| <u>N-terminal domain: <i>TmFusion</i> 1-435 aa (435 aa) / <i>TsFusion</i> 1-435 aa (435 aa) / <i>TfFusion</i> 1-432 aa (432 aa)</u> |                                          |                      |                        |                                                                                     |                   |
| class-III aminotransferase, CrmG (523 aa)                                                                                           | <i>Actinobolobacterium</i> sp. WH1-22166 | 5DDW(D) <sup>b</sup> | 2.6.1                  | 7-430 (97%) <i>TmTAm</i><br>7-430 (97%) <i>TsTAm</i><br>3-427 (98%) <i>TfTAm</i>    | 33%<br>33%<br>33% |
| class-III aminotransferase, ω-TATR (451 aa)                                                                                         | <i>Thermomicrobium roseum</i> DSM 5159   | 6IO1(B) <sup>c</sup> | 2.6.1                  | 4-421 (95%) <i>TmTAm</i><br>4-421 (95%) <i>TsTAm</i><br>4-420 (96%) <i>TfTAm</i>    | 35%<br>35%<br>33% |
| YgjG putrescine aminotransferase-protein a-zpa963-calmodulin complex (YgjG, 499 aa)                                                 | <i>Escherichia coli</i>                  | 5H7D(I) <sup>d</sup> | 2.6.1.82; 2.6.1.29     | 1-433 (97%) <i>TmTAm</i><br>1-433 (99%) <i>TsTAm</i><br>4-431 (98%) <i>TfTAm</i>    | 38%<br>38%<br>34% |
| aminotransferase, PigE (861 aa)                                                                                                     | <i>Serratia</i> sp. FS14                 | 4PPM(B)              | 2.6.1                  | 1-425 (97%) <i>TmTAm</i><br>1-424 (97%) <i>TsTAm</i><br>4-421 (96%) <i>TfTAm</i>    | 41%<br>42%<br>40% |
| putrescine aminotransferase, YgjG (467 aa)                                                                                          | <i>Escherichia coli</i>                  | 4UOX(B)              | 2.6.1.82; 2.6.1.29     | 1-423 (97%) <i>TmTAm</i><br>1-423 (97%) <i>TsTAm</i><br>4-420 (96%) <i>TfTAm</i>    | 38%<br>38%<br>33% |
| aminoadipate semialdehyde transaminase, LysW (344 aa)                                                                               | <i>Thermus thermophilus</i> HB8          | 1VEF(A)              | 2.6.1.11/2.6.1.118     | 1-418 (95%) <i>TmTAm</i><br>1-418 (95%) <i>TsTAm</i><br>17-415 (92%) <i>TfTAm</i>   | 39%<br>38%<br>35% |
| acetylornithine aminotransferase, ACOAT (385 aa)                                                                                    | <i>Thermotoga maritima</i> MSB8          | 2ORD(A)              | 2.6.1.11               | 9-421 (94%) <i>TmTAm</i><br>2-421 (96%) <i>TsTAm</i><br>7-418 (95%) <i>TfTAm</i>    | 37%<br>37%<br>37% |
| acetylornithine aminotransferase, ACOAT (376)                                                                                       | <i>Aquifex aeolicus</i> VF5              | 2EH6(A)              | 2.6.1.11               | 20-418 (91%) <i>TmTAm</i><br>19-418 (91%) <i>TsTAm</i><br>13-415 (91%) <i>TfTAm</i> | 39%<br>38%<br>37% |

<sup>a</sup> EC 2.6.1: transaminases; 2.6.1.11: acetylornithine transaminase; 2.6.1.29: diamine transaminase; EC 2.6.1.82: putrescine-2-oxoglutarate transaminase; EC 2.6.1.118: [amino group carrier protein]-γ-(L-lysyl)-L-glutamate aminotransferase;  
<sup>b</sup> released in August 2016 but omitted by search algorithms until 2019.  
<sup>c</sup> released in May 2019.  
<sup>d</sup> released in June 2017.

**Table S11. Thermophilic enzyme C-terminal domain principal structural homologs.**

| Structural Homolog                                                           | Organism                                                               | PDB ID (chain)       | EC number <sup>a</sup> | Aligned residues / coverage (%) | Seq. ID (%) |
|------------------------------------------------------------------------------|------------------------------------------------------------------------|----------------------|------------------------|---------------------------------|-------------|
| <u>C-terminal domain: TmFusion 436-981 aa (546 aa)</u>                       |                                                                        |                      |                        |                                 |             |
| long-chain acyl-[acyl-carrier-protein] reductase, AAR (341 aa)               | <i>Synechococcus elongatus</i> PCC 7942 = FACHB-805                    | 6JZU(A) <sup>b</sup> | 1.2.1.80               | 534-955 (76%)                   | 27%         |
| D-3-phosphoglycerate dehydrogenase, PGDH (528 aa)                            | (cyanobacteria)                                                        | 1YGY(A)              | 1.1.1.95, 1.1.1.399    | 649-955 (55%)                   | 33%         |
| glutamyl-tRNA reductase, GluTR (404 aa)                                      | <i>Mycobacterium tuberculosis</i>                                      | 1GPJ(A)              | 1.2.1.70               | 605-885 (51%)                   | 34%         |
| NADP-dependent malic enzyme (439 aa)                                         | <i>Methanopyrus kandleri</i>                                           | 1WW8(A)              | 1.1.1.38               | 661-974 (57%)                   | 24%         |
| Adenosylhomocysteinase, AdoHcyase (466 aa)                                   | <i>Pyrococcus horikoshii</i> Ot3                                       | 3N58(D)              | 3.3.1.1                | 661-980 (58%)                   | 25%         |
| bifunctional methylenetetrahydrofolate dehydrogenase-cyclohydrolase (281 aa) | <i>Brucella abortus</i> 2308                                           | 2C2X(B)              | 1.5.1.5/3.5.4.9        | 664-888 (40%)                   | 45%         |
|                                                                              | <i>Mycobacterium tuberculosis</i>                                      |                      |                        |                                 |             |
| <u>C-terminal domain: TsFusion 436-886 aa (451 aa)</u>                       |                                                                        |                      |                        |                                 |             |
| long-chain acyl-[acyl-carrier-protein] reductase, AAR (341 aa)               | <i>Synechococcus elongatus</i> PCC 7942 = FACHB-805                    | 6JZU(A) <sup>b</sup> | 1.2.1.80               | 478-860 (76%)                   | 28%         |
| D-lactate dehydrogenase (329 aa)                                             | (cyanobacteria)                                                        | 4CUK(A)              | 1.1.1.28               | 561-778 (48%)                   | 32%         |
| phosphite dehydrogenase (336 aa)                                             | <i>Salmonella enterica</i> subsp. <i>enterica</i> serovar <i>Typhi</i> | 4E5K(C)              | 1.20.1.1               | 592-778 (41%)                   | 38%         |
| glycerate dehydrogenase/glyoxylate reductase (311 aa)                        | <i>Pseudomonas stutzeri</i>                                            | 2CUK(C)              | 1.1.1                  | 593-778 (41%)                   | 40%         |
| C-1-tetrahydrofolate synthase (298 aa)                                       | <i>Thermus thermophilus</i> HB8                                        | 4CJX(A)              | 1.5.1.5                | 608-793 (41%)                   | 39%         |
| D-lactate dehydrogenase (335 aa)                                             | <i>Trypanosoma brucei brucei</i> TREU927                               | 4XKJ(A)              | 1.1.1.28               | 608-793 (47%)                   | 30%         |
|                                                                              | <i>Sporolactobacillus inulinus</i> CASD                                |                      |                        |                                 |             |
| <u>C-terminal domain: TfFusion 433-902 aa (470 aa)</u>                       |                                                                        |                      |                        |                                 |             |
| long-chain acyl-[acyl-carrier-protein] reductase, AAR (341 aa)               | <i>Synechococcus elongatus</i> PCC 7942 = FACHB-805                    | 6JZU(A) <sup>b</sup> | 1.2.1.80               | 465-870 (85%)                   | 28%         |
| malic enzyme (487 aa)                                                        | (cyanobacteria)                                                        | 3NV9(A)              | 1.1.1.40               | 594-900 (64%)                   | 27%         |
| NAD-dependent malate oxidoreductase (376 aa)                                 | <i>Entamoeba histolytica</i>                                           | 1VL6(A)              | 1.1.1.37               | 594-828 (49%)                   | 29%         |
| D-2-hydroxyisocaproate dehydrogenase, D-HICDH (333 aa)                       | <i>Thermotoga maritima</i> MSB8                                        | 1DXY(A)              | 1.1.1                  | 550-788 (50%)                   | 31%         |
| glutamyl-tRNA reductase, GluTR (404 aa)                                      | <i>Lactocaseibacillus casei</i>                                        | 1GPJ(A)              | 1.2.1.70               | 589-800 (44%)                   | 25%         |
| S-adenosylhomocysteine hydrolase, AdoHcyase (404 aa)                         | <i>Methanopyrus kandleri</i>                                           | 3X2F(A)              | 3.3.1.1                | 597-886 (61%)                   | 23%         |
|                                                                              | <i>Thermotoga maritima</i> MSB8                                        |                      |                        |                                 |             |

<sup>a</sup> EC 1.1.1.1: oxidoreductases acting on the CH-OH groups using NAD(P)<sup>+</sup>; EC 1.1.1.28: D-lactate dehydrogenase (NAD<sup>+</sup>); EC 1.1.1.37: malate dehydrogenase (NAD<sup>+</sup>); EC 1.1.1.38: malate dehydrogenase (oxaloacetate-decarboxylating) (NAD<sup>+</sup>); EC 1.1.1.40: malate dehydrogenase (oxaloacetate-decarboxylating) (NADP<sup>+</sup>); EC 1.1.1.95: phosphoglycerate dehydrogenase (NAD<sup>+</sup>); EC 1.1.1.399: α-ketoglutarate reductase (NAD<sup>+</sup>); EC 1.2.1.70: glutamyl-tRNA reductase (an oxidoreductase that acts on the aldehyde or oxo group using NADP<sup>+</sup>); EC 1.2.1.80: long-chain / fatty acid acyl-[acyl-carrier-protein] reductase; EC 1.5.1.5: methylenetetrahydrofolate dehydrogenase (an oxidoreductase that acts on CH-NH group using NADP<sup>+</sup>); EC 1.20.1.1: phosphite dehydrogenase (an oxidoreductase that acts on phosphorus or arsenic using NAD<sup>+</sup>); EC 3.3.1.1: adenosylhomocysteinase (a thioether/trialkylsulfonium hydrolase – acts on ether bonds); EC 3.5.4.9: methylenetetrahydrofolate cyclohydrolase (a hydrolase that acts on non-peptide forming carbon-nitrogen bonds in cyclic amidines).

<sup>b</sup> released in April 2020.

### 1.1.10 3D Models

3D models were generated using AlphaFold (DeepMind and EMBL-EBI)<sup>13,14</sup> to visualise the proximity between the TAM and AAR domain active sites. *PpKTFusion*, *TmFusion*, *TsFusion*, and *TfFusion* structures were comparable but highlighted differences in the linker length and slight variations in the domain organisation, (Fig. S4(A)). The distance between the catalytic residues in the TAM and AAR domains, which fell within the top 10% conservation scores (Fig. S4(B), Fig. S3), was determined at ca. 50 Å.

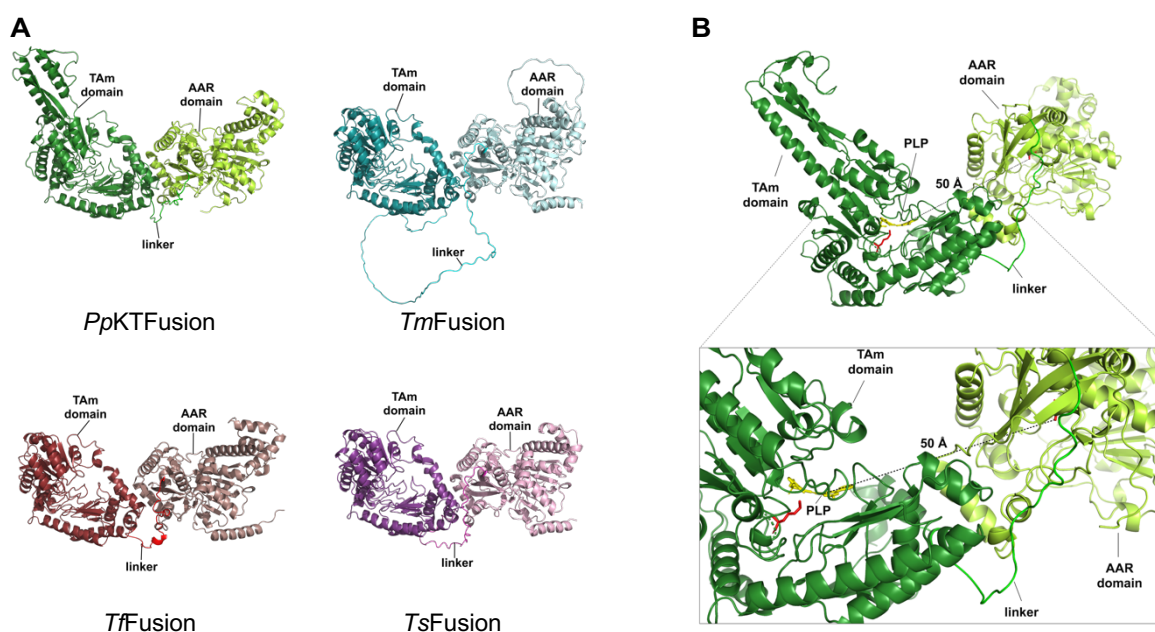

**Fig. S4. 3D models of the *P. putida* KT2440 transaminase fusion and its thermophilic homologs.** (A) Comparison of the predicted structures of *PpKTFusion* (linker: 33 aa), *TfFusion* (linker: 29 aa), *TmFusion* (linker: 95 aa), and *TsFusion* (linker: 40 aa), highlighting the difference in the linker peptide length. Structures were generated by AlphaFold (DeepMind/EMBL-EBI), accessible at <https://alphafold.ebi.ac.uk>. Linker regions were predicted with very low confidence (pLDDT < 50). (B) *PpKTFusion* monomer structure outline, showing the TAM and AAR domain active sites' proximity. The distance between the catalytic residues (C910 in the AAR domain and K348 in the TAM domain, highlighted in red) was approximately 50 Å.

### 1.1.11 Structural alignment

**Table S12. Results of *PpKTFusion* conserved residue mapping to AAR and thermophilic homologs through a 3D structure alignment.**

| C-terminal domain conserved residues  |                                       |                                       |                                       |                                       |
|---------------------------------------|---------------------------------------|---------------------------------------|---------------------------------------|---------------------------------------|
| AAR (6JZU)                            | <i>PpKTFusion</i>                     | <i>TmFusion</i>                       | <i>TsFusion</i>                       | <i>TjFusion</i>                       |
| L4                                    | F564                                  | F534                                  | F479                                  | F465                                  |
| G99                                   | G666                                  | G632                                  | G577                                  | G565                                  |
| G130                                  | G689                                  | G655                                  | G600                                  | G588                                  |
| N131                                  | N690                                  | N656                                  | N601                                  | N589                                  |
| T134                                  | T693                                  | T659                                  | T604                                  | T592                                  |
| G162                                  | G721                                  | G687                                  | G632                                  | G620                                  |
| G165                                  | G724                                  | G690                                  | G635                                  | G623                                  |
| D244                                  | D860                                  | D861                                  | D767                                  | D776                                  |
| C294                                  | C910                                  | C909                                  | C815                                  | C824                                  |
| E297                                  | E913                                  | E912                                  | E818                                  | E827                                  |
| <sup>162</sup> GATGDIG <sup>168</sup> | <sup>721</sup> GAAGNVA <sup>727</sup> | <sup>687</sup> GATGAIG <sup>693</sup> | <sup>632</sup> GATGAIG <sup>638</sup> | <sup>620</sup> GATGSIG <sup>626</sup> |

Residue C910 was among residues with the top 10% conservation scores in *PpKTFusion* (Fig. S3). Mapping primary sequence conserved residues from the *PpKTFusion* C-terminal domain back onto the AAR sequence showed that 9 out of 10 residues were fully conserved, despite the low (25%-28%) primary sequence similarity, (Table S12).

## 1.2 Protein expression and purification

### 1.2.1 Protein expression – general protocol

*E. coli* BL21(DE3) and Rosetta™ 2(DE3) glycerol stocks (50 µL) containing plasmids with target genes were inoculated in 5-10 mL of LB or TB in 50 mL Falcon tubes supplemented with an appropriate antibiotic (kanamycin at 50 µg.mL<sup>-1</sup> final concentration for pET-28a(+) plasmids in *E. coli* BL21(DE3); or kanamycin at 50 µg.mL<sup>-1</sup> and chloramphenicol at 25 µg.mL<sup>-1</sup> final concentration to maintain pET-28a(+) and the host's pRARE2 plasmid, in Rosetta™ 2(DE3)). Cultures were incubated in a shaking incubator at 37 °C, 250 rpm, overnight. The following day, these starter cultures were used to inoculate 100-400 mL of LB or TB in 2 L baffled conical flasks at 1-2% v.v<sup>-1</sup>, adding antibiotic as stated and incubating at 30-37 °C, 180-230 rpm, until OD<sub>600</sub> 0.4-0.8 (measured by Jenway 7315 spectrophotometer in 1 mL aliquots). Cultures were induced with 1 mM IPTG and incubated for 5-72 hours at 18-37 °C, 180-230 rpm, for protein expression.

Thirty minutes prior to harvesting, cultures were supplemented with a co-factor at 0.1-0.5 mM final concentration (PLP for CvTAm, PpKTTAm, TmTAm, TsTAm, TfTAm; PLP and NAD<sup>+</sup>/NADP<sup>+</sup> for PpKTFusion, TmFusion, TsFusion, TfFusion; and NAD<sup>+</sup>/NADP<sup>+</sup> for PpKTDHR, TmDHR, TsDHR, TfDHR). A small amount of culture was removed for whole cell SDS-PAGE analysis. Then, cultures were pelleted by centrifugation at 10,000 x *g* for 10 mins at 4 °C in an Eppendorf centrifuge 5810R or Beckman Coulter Avanti J-20 XPI Centrifuge. Pellets were either used immediately or stored at -80 °C until needed. Protein size was estimated by ExPASy ProtParam online tool. Expression details concerning individual enzyme sets are provided in Figures.

### 1.2.2 Lysate preparation by sonication

Cell pellets were resuspended in IMAC1 buffer (20 mM NaPi, 0.5 M NaCl, 5 mM imidazole pH 7.4), for protein purification at 1:25 ratio of buffer to culture volume, adding appropriate co-factors to 0.1 mM and mixing to homogeneity on ice. The cell suspension was sonicated on ice in 7.5 mL batches 10 s ON 10 s OFF for ~20 cycles, or until the suspension became homogeneous, at 8-micron amplitude using MSE Sanyo Soniprep150. Lysed cells were spun down at 10,000 x *g* for 30-45 mins at 4 °C, after which the supernatant, or soluble protein fraction, was immediately transferred to new tubes. Both soluble (supernatant) and insoluble (pelleted debris) fractions were used for SDS-PAGE analysis. The clarified cell lysate was used for protein purification.

### 1.2.3 Enzyme purification

The clarified cell lysate was loaded onto a 10 mL column containing 7.5 mL Ni Sepharose® 6 Fast Flow (Cytiva), for His-tag gravity-flow purification. The column was washed with 1 x cv of IMAC1 (20 mM NaPi, 0.5 M NaCl, 5 mM imidazole, pH 7.4), followed by 5 x cv of IMAC2 (20 mM NaPi, 0.5 M NaCl, 20 mM imidazole, pH 7.4), 5 x cv IMAC3 (20 mM NaPi, 0.5 M NaCl, 50 mM imidazole, pH 7.4), and 2 x cv IMAC4 (20 mM NaPi, 0.5 M NaCl, 100 mM imidazole, pH 7.4). The protein was eluted with 1-2 x cv of IMAC5 (20 mM NaPi, 0.5 M NaCl, 500 mM imidazole, pH 7.4). A VM20 Vacuum Manifold (Sigma-Aldrich), attached to a vacuum tap, was used to speed up the washing steps (IMAC1-IMAC4), utilizing vacant butterfly valves for regulation of the suction speed. Collection of the elution fraction was initiated once protein presence was confirmed by the Bradford reagent (detected by mixing 5 µL from the eluting drops with 250 µL of the reagent). The purified enzyme was supplemented with a co-factor(s) and precipitated using ammonium sulfate to 70-80% saturation, then stored at 4 °C until needed.

The observed molecular weight of the truncated thermophilic TAmS was somewhat lower than predicted by the ProtParam tool, presumably due to a high content of non-polar residues<sup>15</sup> (58% in TmTAm, 58% in TsTAm, and 54% in TfTAm), (Fig. S6, Fig. S7, Fig. S8, and Fig. S18, Fig. S21, and Fig. S24).

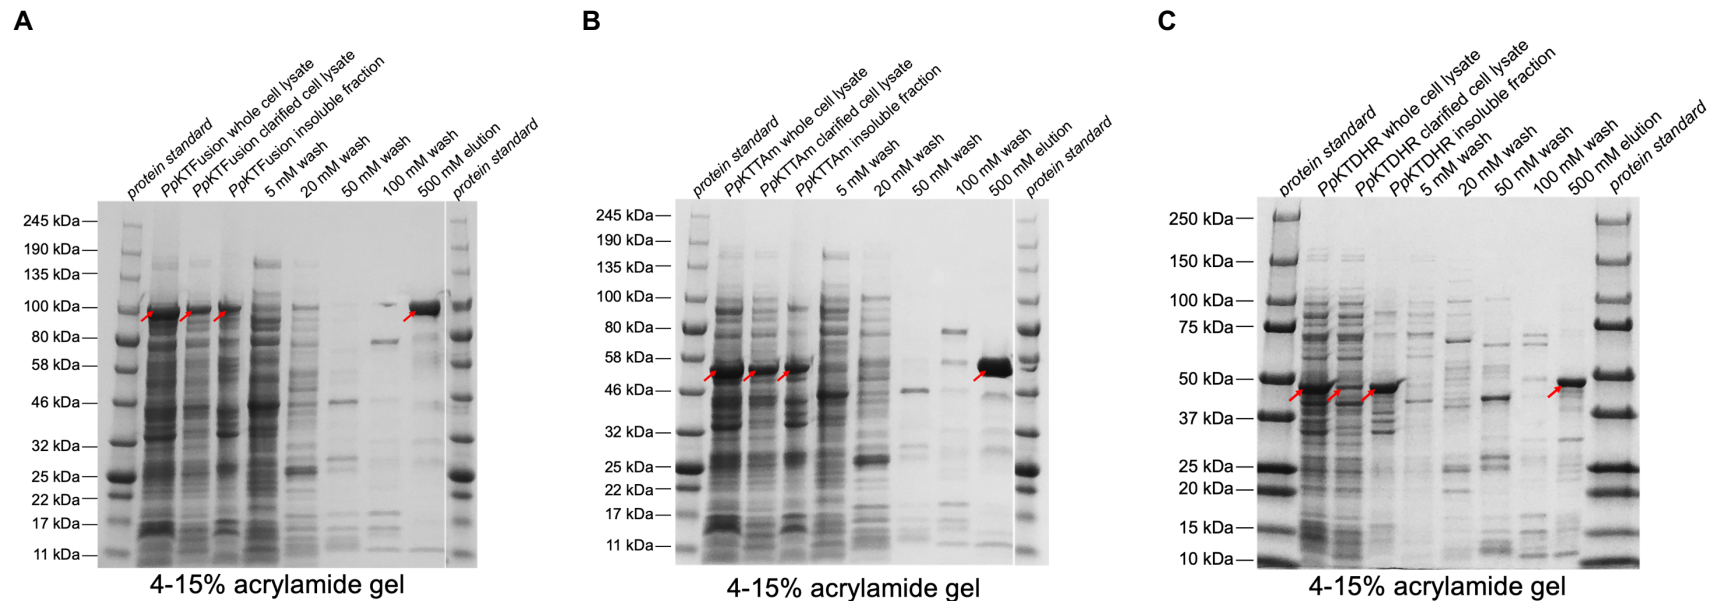

**Fig. S5. SDS-PAGE of *PpKTFusion*, *PpKTTAm*, and *PpKTDHR* expression, post-optimisation.** Denaturing polyacrylamide gels of (A) *PpKTFusion* (107 kDa, 979 aa), (B) *PpKTTAm* (60 kDa, 546 aa), and (C) *PpKTDHR* (49 kDa, 454 aa) showing the respective enzyme bands in whole cells, clarified cell lysate, insoluble fraction, and the purification steps (indicated by red arrows). All ORFs contained a N-terminal His<sub>6</sub>-tag and were expressed in *E. coli* BL21(DE3), inducing with 1 mM IPTG at 0.5-0.6 OD<sub>600</sub> (*PpKTFusion* and *PpKTTAm*) or 0.8-1.0 OD<sub>600</sub> (*PpKTDHR*), and incubating at 18 °C for 72 hours at 180 rpm. PLP and NAD(P)<sup>+</sup>a (at 0.5 mM) co-factors were added 30 minutes prior to cell harvesting. Lysates were prepared using sonication, purifying enzymes from the soluble fraction via a nickel column. Protein size was estimated by ExPASy ProtParam online tool. *PpKTFusion* – fusion; *PpKTTAm* – N-terminal domain; *PpKTDHR* – C-terminal domain. <sup>a</sup> PLP and NAD(P)<sup>+</sup> for *PpKTFusion*, PLP for *PpKTTAm*; NAD(P)<sup>+</sup> for *PpKTDHR*.

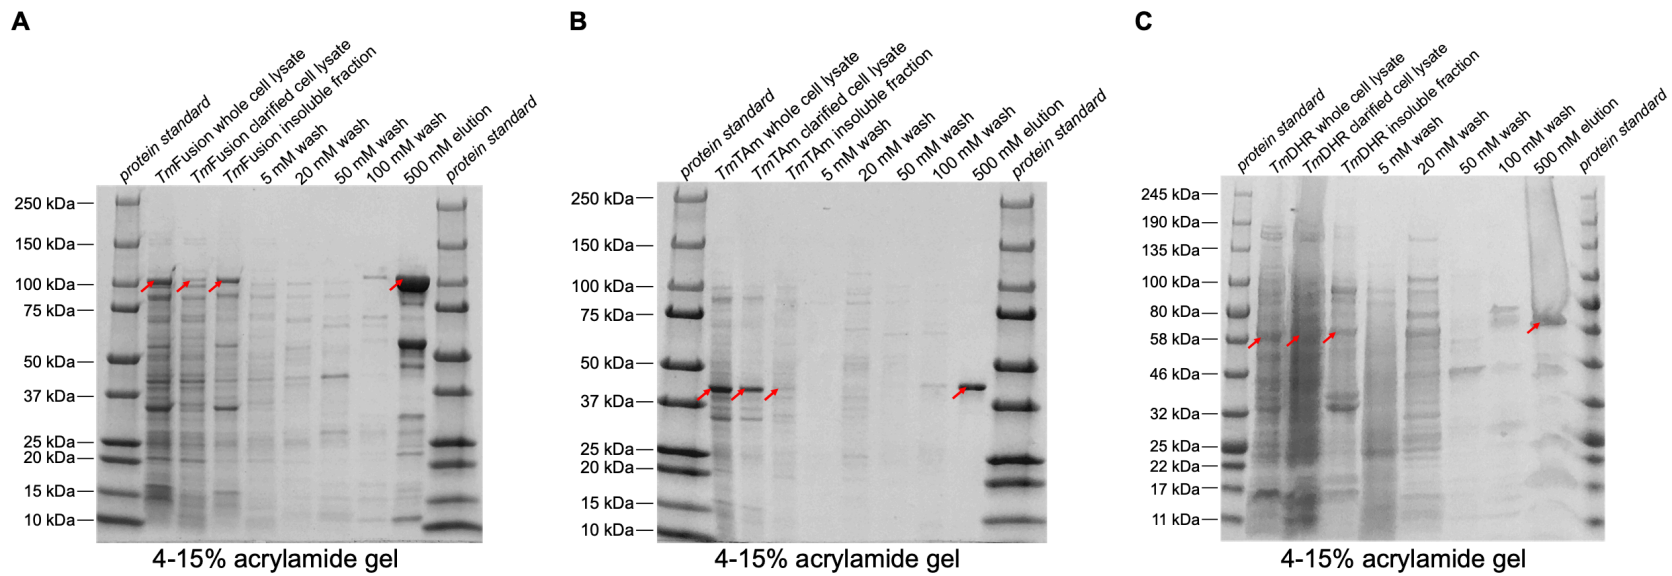

**Fig. S6. SDS-PAGE gel of *TmFusion*, *TmTAM*, and *TmDHR* expression.** Denaturing polyacrylamide gels of (A) *TmFusion* (107 kDa, 1001 aa), (B) *TmTAM* (~43 kDa (observed), 50 kDa (predicted), 455 aa), and (C) *TmDHR* (60 kDa, 567 aa) showing the respective enzyme bands in whole cells, clarified cell lysate, insoluble fraction, and the purification steps (indicated by red arrows). *TmFusion* and *TmTAM* were expressed in *E. coli* BL21(DE3), *TmDHR* was expressed in *E. coli* Rosetta™ 2(DE3), inducing with 1 mM IPTG at 0.5-0.6 OD<sub>600</sub> (*TmFusion* and *TmTAM*) or 0.8-0.9 OD<sub>600</sub> (*TmDHR*), and incubating at 30/37 °C for 72 hours at 180 rpm. Sorbitol (0.5 M)<sup>16</sup> was added to *TmFusion* culture at scale up. PLP and NAD(P)<sup>+</sup> (at 0.1 mM) co-factors were added 30 minutes prior to cell harvesting. Lysates were prepared using sonication, purifying enzymes from the soluble fraction via a nickel column. Protein size for *TmFusion*, *TmTAM* and *TmDHR* was estimated by ExPASy ProtParam online tool. <sup>a</sup> PLP and NAD(P)<sup>+</sup> for *TmFusion*, PLP for *TmTAM*; NAD(P)<sup>+</sup> for *TmDHR*.



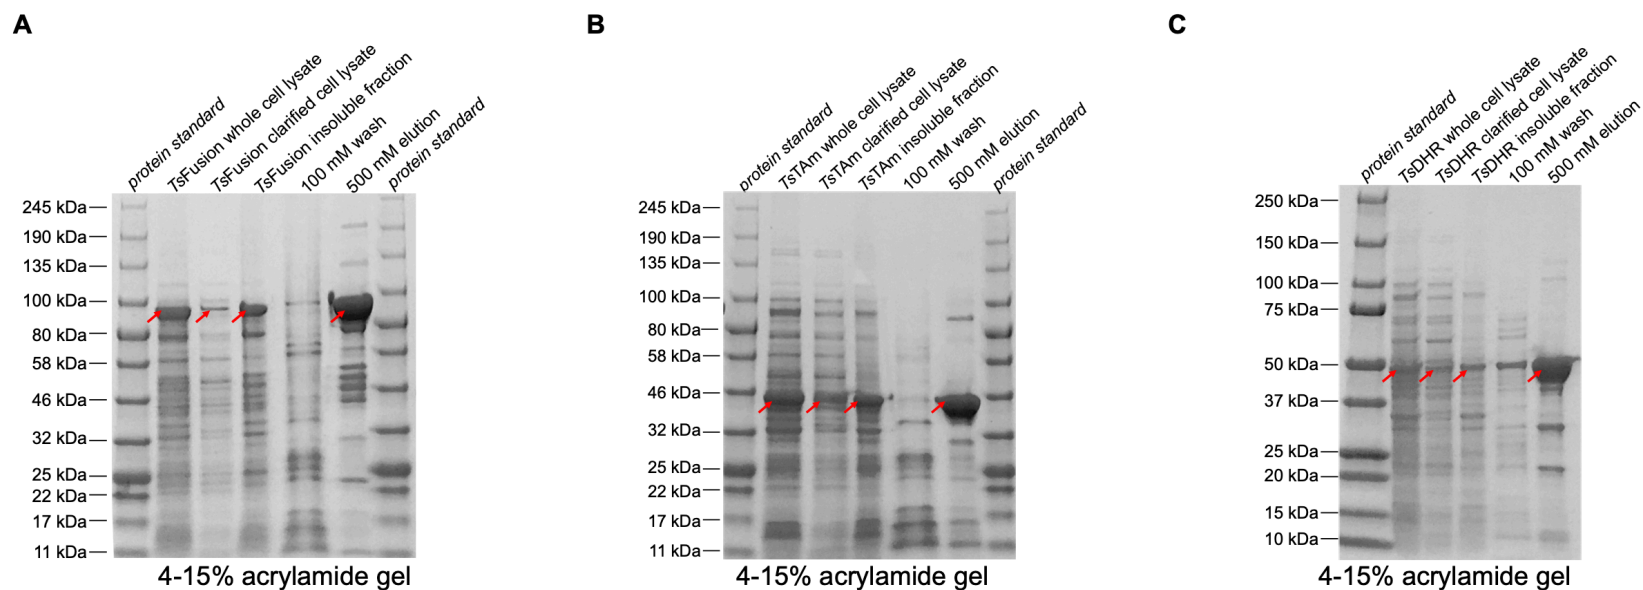

**Fig. S7. SDS-PAGE gel of *TsFusion*, *TsTAm*, and *TsDHR* expression.** Denaturing polyacrylamide gels of (A) *TsFusion* (98 kDa, 906 aa), (B) *TsTAm* (~43 kDa (observed), 50 kDa (predicted), 455 aa), and (C) *TsDHR* (51 kDa, 472 aa) showing the respective enzyme bands in whole cells, clarified cell lysate, insoluble fraction, and the purification steps (indicated by red arrows). *TsFusion* and *TsTAm* were expressed in *E. coli* Rosetta™ 2(DE3), *TsDHR* was expressed in *E. coli* BL21(DE3), inducing with 1 mM IPTG at 0.5-0.6 OD<sub>600</sub> (*TsFusion*, *TsTAm*, and *TsDHR*) and incubating at 37 °C for 72 hours at 180 rpm. Sorbitol (0.5 M)<sup>16</sup> was added to *TsFusion* and *TsTAm* cultures at scale up. PLP and NAD(P)<sup>+</sup>a (at 0.1 mM) co-factors were added 30 minutes prior to cell harvesting. Lysates were prepared using sonication, purifying enzymes from the soluble fraction via a nickel column. Protein size for *TsFusion*, *TsTAm* and *TsDHR* was estimated by ExPASy ProtParam online tool. <sup>a</sup> PLP and NAD(P)<sup>+</sup> for *TsFusion*, PLP for *TsTAm*; NAD(P)<sup>+</sup> for *TsDHR*.

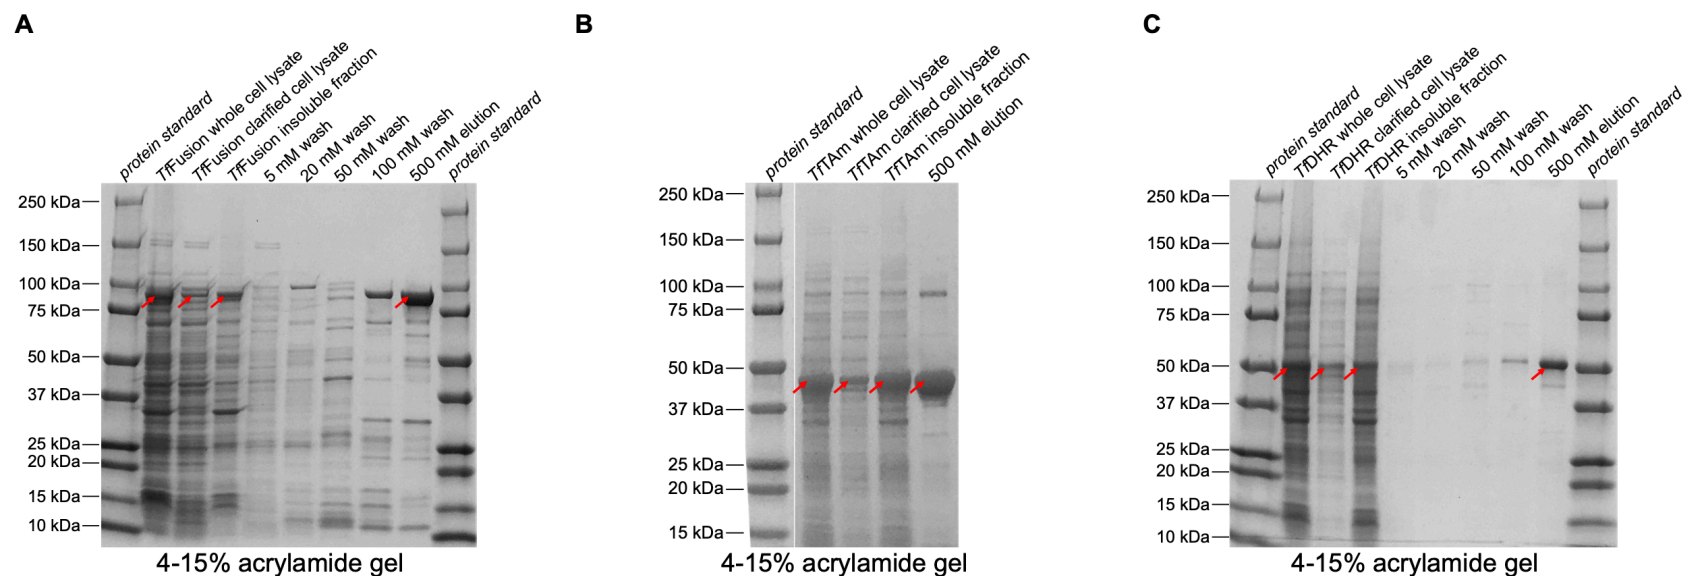

**Fig. S8. SDS-PAGE gel of *TffFusion*, *TftAm*, and *TfdHr* expression.** Denaturing polyacrylamide gels of (A) *TffFusion* (101 kDa, 922 aa), (B) *TftAm* (~43 kDa (observed), 50 kDa (predicted), 452 aa), and (C) *TfdHr* (54 kDa, 491 aa) showing the respective enzyme bands in whole cells, clarified cell lysate, insoluble fraction, and the purification steps (indicated by red arrows). *TffFusion* and *TftAm* were expressed in *E. coli* Rosetta™ 2(DE3), *TfdHr* was expressed in *E. coli* BL21(DE3), inducing with 1 mM IPTG at 0.5-0.6 OD<sub>600</sub> (*TffFusion*, *TftAm*, and *TfdHr*) and incubating at 37 °C for 72 hours at 180 rpm. Sorbitol (0.5 M)<sup>16</sup> was added to *TffFusion* and *TftAm* cultures at scale up. PLP and NAD(P)<sup>+</sup>a (at 0.1 mM) co-factors were added 30 minutes prior to cell harvesting. PLP and NAD(P)<sup>+</sup>a (at 0.1 mM) co-factors were added 30 minutes prior to cell harvesting. Lysates were prepared using sonication, purifying enzymes from the soluble fraction via a nickel column. Protein size for *TffFusion*, *TftAm* and *TfdHr* was estimated by ExpASY ProtParam online tool. <sup>a</sup> PLP and NAD(P)<sup>+</sup> for *TffFusion*, PLP for *TftAm*; NAD(P)<sup>+</sup> for *TfdHr*.

### 1.3 Enzyme assays

#### 1.3.1 Colorimetric assays with purified enzymes

Qualitative screening of transaminase activity was carried out via colorimetric assays using Ni-column-purified enzymes. Reactions were performed at 200  $\mu$ L in 96-well plates at 30  $^{\circ}$ C (*PpKTFusion*, *PpKTTAm*, *CvTAm*) or at 50  $^{\circ}$ C (*TmFusion*, *TsFusion*, *TffFusion*, *TmTAm*, *TsTAm*, *TftAm*) for 18 hours. Reactions contained 50 mM HEPES buffer at pH 7.5, 25 mM 2-(4-nitrophenyl)ethan-1-amine hydrochloride **44** as amine donor, 10 mM amino acceptor / substrate (keto acids: pyruvate **3**,  $\alpha$ -ketoglutarate **4**, HPA **5**, 2-ketobutyrate **17**, 4-hydroxyphenylpyruvate **18**, 4-methyl-2-oxovalerate **19**, levulinate **20**, oxaloacetate **21**; aldehydes: benzaldehyde **1**, hexanal **2**, 2-phenylacetaldehyde **12**, 3-phenylpropionaldehyde **13**, butanal **14**, trans cinnamaldehyde **15**, vanillin **16**; ketones: ethyl acetoacetate **6**, acetophenone **7**, 1-indanone **8**, 2-heptanone **9**, 1,2-cyclohexanedione **10**, ethyl 4-oxocyclohexanecarboxylate **11**, 4-phenylbutanone **22**, cyclohexanone **23**, 3-acetyl-1-propanol **24**), 1.0 mM PLP, DMSO at 0-10% v.v<sup>-1</sup>, and purified enzyme at 0.01 mg.mL<sup>-1</sup>. Reactions were initiated by the addition of enzyme and performed in either duplicate or triplicate. Control reactions were prepared as above but lacked an enzyme (C1). All chemical stocks were prepared at 10X concentration in 50% or 100% DMSO (except **3**, **21** and **44**, which were prepared in 100% dH<sub>2</sub>O), to ensure solubility, resulting in 0%, 5% or 10% v.v<sup>-1</sup> DMSO final reaction concentration.

#### 1.3.2 End-point assays

Transaminase activity with various amine donors was determined by analysis of the conversion of 3-phenylpropionaldehyde **13** to 3-phenyl-1-propylamine **43**, using HPLC. Reactions were performed at 200  $\mu$ L in 96-well plates at 30  $^{\circ}$ C (*PpKTFusion*, *PpKTTAm*, *CvTAm*) or at 50  $^{\circ}$ C (*TmFusion*, *TsFusion*, *TffFusion*, *TmTAm*, *TsTAm*, *TftAm*) for 18 hours. Reactions contained 50 mM HEPES buffer at pH 7.5, 25 mM amine donor (1-aminoindan **25**, 2-aminoheptane **26**, 2-phenylethylamine **27**, 4-phenylbutan-2-amine **28**, 6-aminohexanoic acid **29**, benzhydrylamine **30**, benzylamine **31**, cyclohexanamine **32**, D-alanine **33**, ethyl 3-aminobutyrate **34**, L-alanine **35**, L-glutamate **36**, L-serine **37**, (*S*)-MBA **38**, L-lysine **39**, L-arginine **40**, L-aspartate **41**, L-glutamine **42**), 10 mM amine acceptor / substrate (**13**), 1.0 mM PLP, DMSO at 10-20% v.v<sup>-1</sup>, and purified enzyme at 0.05 mg.mL<sup>-1</sup>. Reactions were initiated by the addition of enzyme, terminated by freezing at -80  $^{\circ}$ C; and performed in duplicate. Control reactions were prepared as above but lacked an enzyme (C1) – these were subtracted from enzyme assays to remove any background signals. All amine donor stocks were prepared at 10X concentration in 50% or 100% DMSO (except **33**, **35**, **36**, **37**, **39**, **40**, **41**, and **42**, which were prepared in 100% dH<sub>2</sub>O). Amine acceptor 3-phenylpropionaldehyde **13** was prepared at 10X in 100% DMSO, resulting in 10% or 20% v.v<sup>-1</sup> DMSO final reaction concentration. Product yield in samples was determined using the 3-phenyl-1-propylamine calibration curve (Fig. S9). Errors are reported as standard deviations.

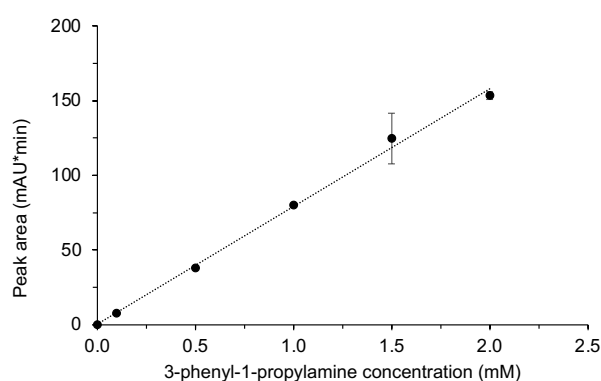

**Fig. S9. Typical 3-phenyl-1-propylamine HPLC standard curve used to determine product concentration in samples.**  $y = 79.043x$ ;  $R^2 = 0.9986$ . Experiments were performed in duplicate. SD <2.6, except measurements at 1.5 mM, where SD was 17.

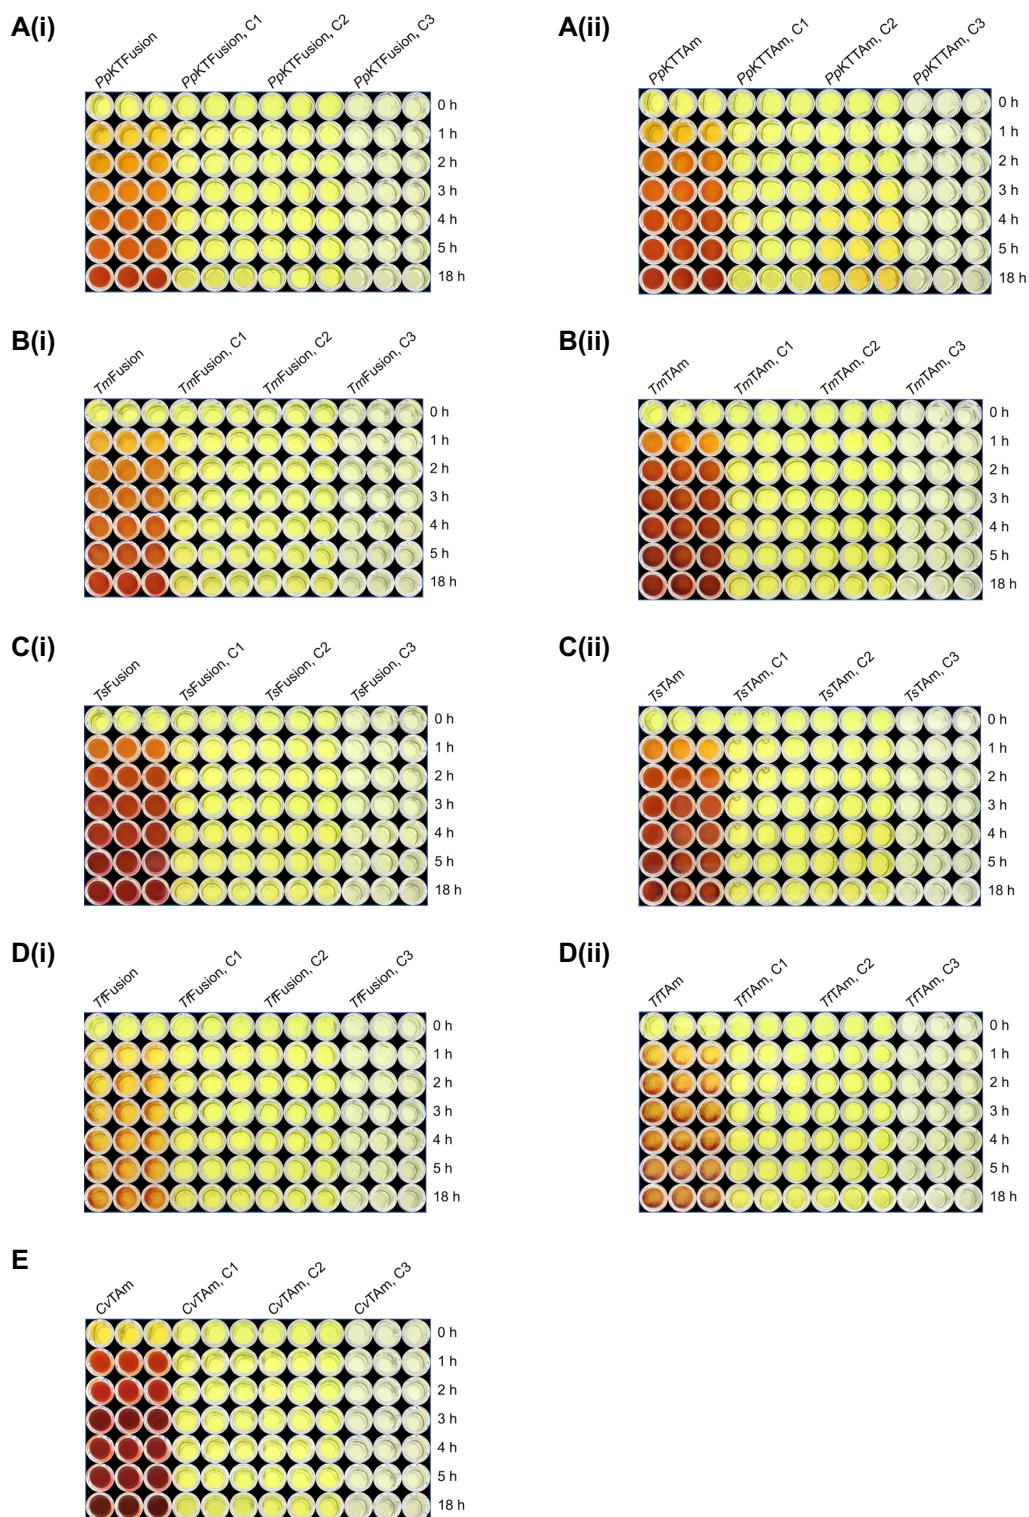

**Fig. S10. Colour intensity development in control samples.** *PpKTFusion* (A(i))/*PpKTTAm* (A(ii)), *TmFusion* (B(i))/*TmTAm* (B(ii)), *TsFusion* (C(i))/*TsTAm* (C(ii)), and *TfFusion* (D(i))/*TfTAm* (D(ii)), and *CvTAm* (E). Assays contained 50 mM HEPES buffer at pH 7.5, 25 mM 2-(4-nitrophenyl)ethan-1-amine **44** as amine donor, 10 mM substrate pyruvate **3**, and purified enzyme at 0.01 mg.mL<sup>-1</sup>. Assays were performed in triplicate and run alongside no enzyme C1, no substrate C2, and no amine donor C3 controls. Reactions were initiated by the addition of enzyme and run at 30 °C (*PpKTFusion*, *PpKTTAm*, *CvTAm*) or at 50 °C (*TmFusion*, *TmTAm*, *TsFusion*, *TsTAm*, *TfFusion*, and *TfTAm*) for 18 hours. The dark red colouration in samples indicates conversion  $\geq 20\%$ .

### 1.3.3 Thermostability assays

Transaminase activity was determined by analysing the conversion of 3-phenylpropionaldehyde **13** to 3-phenyl-1-propylamine **43**, employing L-glutamate **36** as an amine donor, using HPLC. Reactions were performed in 200  $\mu\text{L}$  volumes in 96-well plates at 50 °C for 2 hours. Each reaction contained 50 mM HEPES buffer at pH 7.5, 175 mM L-glutamate **36**, 52.5 mM 3-phenylpropionaldehyde **13**, 0.1 mM PLP, 0.1 mM NADP<sup>+</sup>, 10.5% v.v<sup>-1</sup> DMSO, and purified enzyme *TjfFusion* at 0.1 mg.mL<sup>-1</sup>. To measure the enzyme's residual activity ( $A_{\text{Res}}$ ) following heat treatment, the enzyme was incubated with cofactors at 60 °C and 70 °C for 30, 60 and 120 minutes, then cooled on ice for 2 hours prior to initiating reactions. The enzyme's initial activity ( $A_0$ ) was measured using untreated enzyme. To run assays, all reaction solutions, except for the enzyme, were equilibrated to 50 °C. Reactions were initiated by the addition of the enzyme and terminated by freezing at -80 °C; and performed in triplicate. Control reactions, prepared as above but without enzyme, were subtracted from enzyme assays to remove background signals. The amine donor stock was prepared at 1 M in 100% dH<sub>2</sub>O. The amine acceptor, 3-phenylpropionaldehyde **13**, was prepared at 500 mM in 100% DMSO, resulting in 10.5% DMSO final reaction concentration. Product yield in samples was determined using a 3-phenyl-1-propylamine calibration curve. Errors are reported as standard deviations, (Fig. S11).

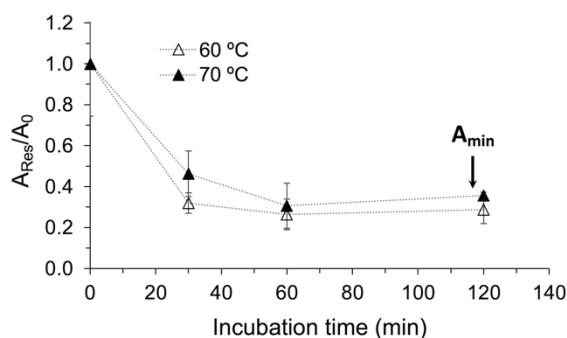

**Fig. S11. Thermostability analysis of *TjfFusion*.** The graph is showing a decrease in the ratio of residual activity ( $A_{\text{Res}}$ ) relative to the initial activity ( $A_0$ ) following incubation at 60 °C and 70 °C over various time periods.

### 1.4 Analytical HPLC

Analytical HPLC was performed using a Dionex<sup>TM</sup> UltiMate<sup>TM</sup> 3000 HPLC System, a Dionex<sup>TM</sup> UltiMate<sup>TM</sup> 3000 Autosampler, a Dionex<sup>TM</sup> UltiMate<sup>TM</sup> 3000 RS Pump, a UltiMate<sup>TM</sup> 3000 RS Diode Array Detector, and a Dionex<sup>TM</sup> UltiMate<sup>TM</sup> 3000 Column Compartment (ThermoFisher Scientific). Reverse-phase chromatography method was used for quantitative achiral analysis of endpoint assay reaction components. Compound separation was achieved employing two mobile phases – (a) dH<sub>2</sub>O with 0.1% v.v<sup>-1</sup> TFA, and (b) acetonitrile – with ACE 5 C18 column (150 × 4.6 mm) (Fig. S12), at 1.0 mL.min<sup>-1</sup> flow rate. The injection volume was 20  $\mu\text{L}$ , with column oven at 30 °C and sample chamber at 4 °C. Standards (see Fig. S9) were run to determine and validate compound concentrations and retention times. A 20-minute method, with UV absorbance at 210 nm, was used with all transaminase assays.

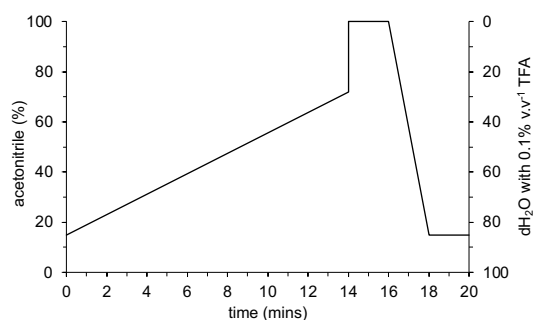

**Fig. S12. Analytical HPLC method.**

## 1.5 Kinetic parameters of *PpKTFusion/PpKTTAm* and *TfFusion/TfTAm*

Kinetic parameters were calculated by fitting data to Michaelis-Menten or substrate inhibition models using non-linear regression (least-squares) analysis in Prism 9 (GraphPad Software LLC). For both models, the confidence interval for the interpolation of the unknowns from a standard curve was set to 95%. For the Michaelis-Menten model, to achieve the best fit, the convergence criteria was set to strict, selecting  $1/Y^2$  weighting method. For the substrate inhibition model, to achieve the best fit, the convergence criteria was set to medium (default), and no weighting was applied (default). For both models, the mean Y values of each point was used, (Fig. S13).

**A**

(i)

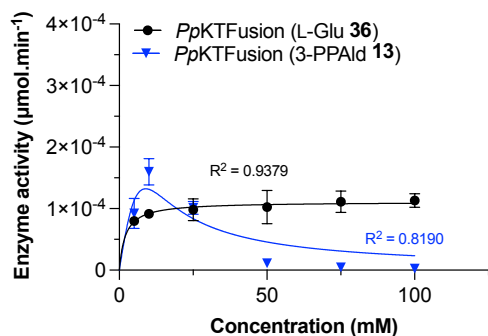

(ii)

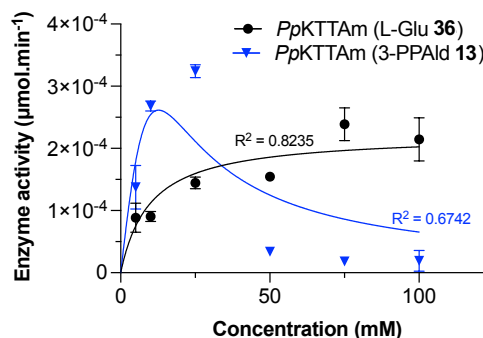

**B**

(i)

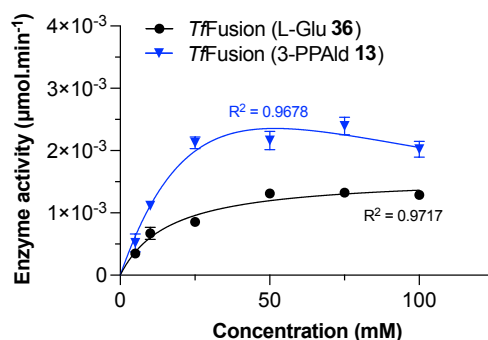

(ii)

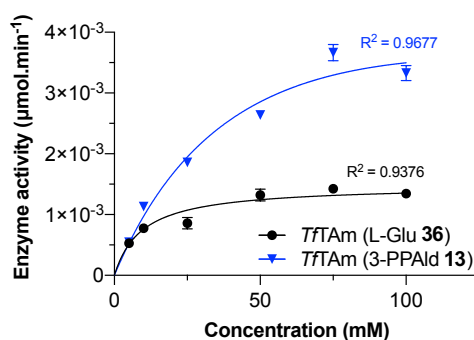

**Fig. S13. Non-linear regression plots of *PpKTFusion/PpKTTAm* and *TfFusion/TfTAm*.** The L-glutamate data was best fitted to the Michaelis-Menten model ( $v = \frac{V_{max} \times [S]}{K_m + [S]}$ ) and the 3-phenylpropionaldehyde data was best fitted to the substrate inhibition model ( $v = \frac{V_{max} \times [S]}{K_m + [S] \times (1 + \frac{[S]}{K_i})}$ ) by the non-linear regression analysis. Where values are large enough, SD is shown as error bars. Analysis and curve fitting were performed by GraphPad Prism 9.

## 2. Protein sequences

### 2.1 *Pseudomonas putida* KT2440 PP\_2782

#### 2.1.1 *PpKTFusion* protein sequence

MGSS **HHHHH**SSG **LVPRGS****HM**TVMDYRDFVVRPKFVGLLQALGLECEFERALGSQLFYRNPKGDMVTVTDFLGGYGAAALFGHNDPQFVDQLCALLRSDVPFNAQMSIRGAAGQLGRALSDAFNRELKNTERYISTFNSNGAEAVEIAVKHAEFRRQKSLQKQFDDIDFTLASLTASEHAYRELDVADLDLPAGVLPATLNSVTLRQVVEAVRQHNLALHIEPVFVALRGSFHGKLVNTVQLTYGRQYRAPFARFGLNVEFIDPQQPHQLQELPARHTHHWLSLQWDGEHLHVLQLPFSAITAVLMEPIQEGGINEFAAEFYLG LRKLCNEQQCPLVVDEVQSGFGRAGTFCLASSQFNLQGDYCLSKALGGGLMKIAATVIRSSHYEGEFSYIHSSTFAEDDPSCHIALSALRRLFADDDAMLKDIRTKGAYLKASLNEKLMAYPDVIADVRGRLLVGLLEHDLVSSSSLVQASAQYNDALGYLIAGYLLQFEALRVAPSGSNSNVIRLEPPACITLGEIDKLI AALQVRCDMLRRGDALPLAA **GICADSM PALPARQDDFRVTE****PVENRDAKV**EVVARVAFINHLIDADILGDVDP SLAALSPEQKRTFINRTKPERRAVPVGPVIIRSRLGMAVEFTLYPLCMDSDAMA EYIRSGDLDSIREEVGRRVTDARADGCSIAGLGYTSIVTNNCQALKIADMALTSGNALTIGMGLEAIEQGCVCVQQGLALCEQTA AVVGAAGNVASTYASVLSATVDHLILIGSGRDG SVRRLEKTAQQIYADAARSILKGTAEHDRLAQRLLTLDGFRGLLHSHGQKADLGLHIARLVDERLGANAFITVTNDLDAIKGARIVLCAANAPQPF LGAEHFAERSVICDIAVPLNVHQDLPSQREDVLYMHGGIVQTPFDDGLAPNV RAYLKKGQLYACMAESVLMGLSGMSQHGSYGDISREQVQV RALAATHGFTLAQFKTQNSL

**Fig. S14. *PpKTFusion* protein sequence.** The protein sequence of *PpKTFusion* with a N-terminal His<sub>6</sub>-tag. The start methionine (M) residue is shown in bold. The N-terminal His<sub>6</sub>-tag is highlighted in green; the thrombin peptide sequence is highlighted in turquoise. The proposed linker region is highlighted in red.

#### 2.1.2 *PpKTTAm* protein sequence

MGSS **HHHHH**SSG **LVPRGS****HM**TVMDYRDFVVRPKFVGLLQALGLECEFERALGSQLFYRNPKGDMVTVTDFLGGYGAAALFGHNDPQFVDQLCALLRSDVPFNAQMSIRGAAGQLGRALSDAFNRELKNTERYISTFNSNGAEAVEIAVKHAEFRRQKSLQKQFDDIDFTLASLTASEHAYRELDVADLDLPAGVLPATLNSVTLRQVVEAVRQHNLALHIEPVFVALRGSFHGKLVNTVQLTYGRQYRAPFARFGLNVEFIDPQQPHQLQELPARHTHHWLSLQWDGEHLHVLQLPFSAITAVLMEPIQEGGINEFAAEFYLG LRKLCNEQQCPLVVDEVQSGFGRAGTFCLASSQFNLQGDYCLSKALGGGLMKIAATVIRSSHYEGEFSYIHSSTFAEDDPSCHIALSALRRLFADDDAMLKDIRTKGAYLKASLNEKLMAYPDVIADVRGRLLVGLLEHDLVSSSSLVQASAQYNDALGYLIAGYLLQFEALRVAPSGSNSNVIRLEPPACITLGEIDKLI AALQVRCDMLRRGDALPLAA

**Fig. S15. *PpKTTAm* protein sequence.** The protein sequence of the *PpKTFusion* N-terminal domain (1-526 aa) (*PpKTTAm*) with a N-terminal His<sub>6</sub>-tag. The start methionine (M) residue is shown in bold. The N-terminal His<sub>6</sub>-tag is highlighted in green; the thrombin peptide sequence is highlighted in turquoise.

#### 2.1.3 *PpKTDHR* protein sequence

MGSS **HHHHH**SSG **LVPRGS****HM****GICADSM PALPARQDDFRVTEPVENRDAKV**EVVARVAFINHLIDADILGDVDP SLAALSPEQKRTFINRTKPERRAVPVGPVIIRSRLGMAVEFTLYPLCMDSDAMA EYIRSGDLDSIREEVGRRVTDARADGCSIAGLGYTSIVTNNCQALKIADMALTSGNALTIGMGLEAIEQGCVCVQQGLALCEQTA AVVGAAGNVASTYASVLSATVDHLILIGSGRDG SVRRLEKTAQQIYADAARSILKGTAEHDRLAQRLLTLDGFRGLLHSHGQKADLGLHIARLVDERLGANAFITVTNDLDAIKGARIVLCAANAPQPF LGAEHFAERSVICDIAVPLNVHQDLPSQREDVLYMHGGIVQTPFDDGLAPNV RAYLKKGQLYACMAESVLMGLSGMSQHGSYGDISREQVQV RALAATHGFTLAQFKTQNSL

**Fig. S16. *PpKTDHR* protein sequence.** The protein sequence of the *PpKTFusion* C-terminal domain (527-959 aa) (*PpKTDHR*) with a N-terminal His<sub>6</sub>-tag. The start methionine (M) residue is shown in bold. The N-terminal His<sub>6</sub>-tag is highlighted in green; the thrombin peptide sequence is highlighted in turquoise. The proposed linker region is highlighted in red.

## 2.2 *Thermaerobacter marianensis* DSM 12885 Tmar\_2123

### 2.2.1 *TmFusion* protein sequence

**M**GSS **HHHHHH**SSG **LVPRGS****H**MHPFRQYVNPHLGELLEQIQMDKRFVVRGQCWLWDEDGRRYLDFVAAYGALPFGFNPPEIW  
AALEEARRQGEPSFIQPSFLNAAGELARRLIEVAPPGLRYVTFANSGAEAVEAAIKLARAATGRPRIILSTENAFHGKTFGA  
LSATHRAAYQDVFFAPAEGFDKVPYGDVAALEQALAAARPEYAAFLVEPIQEGGIVVPPPGYLRAAREICRRHGVLFI  
VD EVQTLGRTGALFACQAEVTPDAMTLAKALGGGLMPIGAVLCTEEVYTEEFATKHSSTFAGNTLACRAGLAALD  
LLTRDD QALVRHVAETGEYLRQGLLAIQRRHPRVIREVVRGRGFMGLGQFGVTRETFFGNLLGVMGEQELLPV  
IASYLLNVEGLRVA PTLNGADVIRIEPPLIATREECDYALAAIERVVLDLIDREDTAGLLRHLVGGQVRVQDRHGAT  
SPDHGMNGRSAAIGRVVVG RSGTGVTRDGDGASRRATGAGELPATGRGGQVGTGTVHGGASQTPAAGSSREE  
PATPSDDPAEGRFAFLVHPVDLENYPEF DPGLAAFTREELADLAGRWNHLLKPFRI  
GQTRVVSTCGRATAYGEFYVVPRTADELLAMPAQEAVA  
AVKEALDLARDGGARIVGLGAYTSVVTRGGLHLRDAGVALTTGNSFTVAAAVEAIDEATRRLGFP  
LAESTVAVVGATGAIGRATALLGPRVQRLLLIGNPARPEQSRRLLRVAGEICRHVLVSA  
GRSPVGRAGRVDGDRDQENHGAPLGGSGAAFFNRFGTAEAGELAPLAAQL LDFGGWPNADAPVEEFVRRLE  
TWMARGQCPLVITTDLDAMLPLADVVTATSSSTAHLVTPGNVKFGAVVCDLSRPPNVSRE  
VRDARPDVLDGGVIEVPGRPSLGNWFGFERGLVYACMAETMILALEHHYQHTSLGADLNLETILWLEELARKHGF  
RRLAQ LRSFDRPLPDEAWERLVAARSAVLGSAAR

**Fig. S17. *TmFusion* protein sequence.** The protein sequence of *TmFusion* with a N-terminal His<sub>6</sub>-tag. The start methionine (M) residue is shown in bold. The N-terminal His<sub>6</sub>-tag is highlighted in green; the thrombin peptide sequence is highlighted in turquoise.

### 2.2.2 *TmTAM* protein sequence

**M**GSS **HHHHHH**SSG **LVPRGS****H**MHPFRQYVNPHLGELLEQIQMDKRFVVRGQCWLWDEDGRRYLDFVAAYGALPFGFNPPEIW  
AALEEARRQGEPSFIQPSFLNAAGELARRLIEVAPPGLRYVTFANSGAEAVEAAIKLARAATGRPRIILSTENAFHGKTFGA  
LSATHRAAYQDVFFAPAEGFDKVPYGDVAALEQALAAARPEYAAFLVEPIQEGGIVVPPPGYLRAAREICRRHGVLFI  
VD EVQTLGRTGALFACQAEVTPDAMTLAKALGGGLMPIGAVLCTEEVYTEEFATKHSSTFAGNTLACRAGLAALD  
LLTRDD QALVRHVAETGEYLRQGLLAIQRRHPRVIREVVRGRGFMGLGQFGVTRETFFGNLLGVMGEQELLPV  
IASYLLNVEGLRVA PTLNGADVIRIEPPLIATREECDYALAAIERVVLDLIDREDTAGLLRHLVGGQVRVQDRHGAT  
SPDHGMNGRSAAIGRVVVG RSGTGVTRDGDGASRRATGAGELPATGRGGQVGTGTVHGGASQTPAAGSSREE  
PATPSDDPAEGRFAFLVHPVDLENYPEF DPGLAAFTREELADLAGRWNHLLKPFRI  
GQTRVVSTCGRATAYGEFYVVPRTADELLAMPAQEAVA  
AVKEALDLARDGGARIVGLGAYTSVVTRGGLHLRDAGVALTTGNSFTVAAAVEAIDEATRRLGFP  
LAESTVAVVGATGAIGRATALLGPRVQRLLLIGNPARPEQSRRLLRVAGEICRHVLVSA  
GRSPVGRAGRVDGDRDQENHGAPLGGSGAAFFNRFGTAEAGELAPLAAQL LDFGGWPNADAPVEEFVRRLE  
TWMARGQCPLVITTDLDAMLPLADVVTATSSSTAHLVTPGNVKFGAVVCDLSRPPNVSRE  
VRDARPDVLDGGVIEVPGRPSLGNWFGFERGLVYACMAETMILALEHHYQHTSLGADLNLETILWLEELARKHGF  
RRLAQ LRSFDRPLPDEAWERLVAARSAVLGSAAR

**Fig. S18. *TmTAM* protein sequence.** The protein sequence of the *TmFusion* N-terminal domain (1-435 aa) (*TmTAM*) with a N-terminal His<sub>6</sub>-tag. The start methionine (M) residue is shown in bold. The N-terminal His<sub>6</sub>-tag is highlighted in green; the thrombin peptide sequence is highlighted in turquoise.

### 2.2.3 *TmDHR* protein sequence

**M**GSS **HHHHHH**SSG **LVPRGS****H**MQGRVQDRHGATSPDHGMNGRSAAIGRVVVG RSGTGVTRDGDGASRRATGAGELPATGRG  
GQVGTGTVHGGASQTPAAGSSREEPATPSDDPAEGRFAFLVHPVDLENYPEFDPGLAAFTREELADLAGRWNHLLKPFRI  
GQTRVVSTCGRATAYGEFYVVPRTADELLAMPAQEAVA  
AVKEALDLARDGGARIVGLGAYTSVVTRGGLHLRDAGVALTTGNSFTVAAAVEAIDEATRRLGFP  
LAESTVAVVGATGAIGRATALLGPRVQRLLLIGNPARPEQSRRLLRVAGEICRHVLVSA  
GRSPVGRAGRVDGDRDQENHGAPLGGSGAAFFNRFGTAEAGELAPLAAQL LDFGGWPNADAPVEEFVRRLE  
TWMARGQCPLVITTDLDAMLPLADVVTATSSSTAHLVTPGNVKFGAVVCDLSRPPNVSRE  
VRDARPDVLDGGVIEVPGRPSLGNWFGFERGLVYACMAETMILALEHHYQHTSLGADLNLETILWLEELARKHGF  
RRLAQ LRSFDRPLPDEAWERLVAARSAVLGSAAR

**Fig. S19. *TmDHR* protein sequence.** The protein sequence of the *TmFusion* C-terminal domain (436-981 aa) (*TmDHR*) with a N-terminal His<sub>6</sub>-tag. The start methionine (M) residue is shown in bold. The N-terminal His<sub>6</sub>-tag is highlighted in green; the thrombin peptide sequence is highlighted in turquoise.



## 2.3 *Thermaerobacter subterraneus* DSM 13965 ThesuDRAFT\_00745

### 2.3.1 *TsFusion* protein sequence

**M**GSS **HHHHHH**SSG **LVPRGS****H**MHPFRQYVNPHLAELLEQIQMDKRFVREGECWLWDDQGRRYLDFVAAYGALPFGFNPPEIW  
AALEEARRHRGEPSEFVQPSFLNAAGELARRLIEVAPPGLRYVTFANSGAEAVEAAIKLARAATGRPRI LSTDNGFHGKTFGA  
LSATHRAAYQDAFFAPAEGFDKVPYGDLEALERALAARPGEYAAFLVEPIQEGGGIVVPPPGYLREAREVCCRHHGVLFIA  
EVQTLGRTGVLFACQAEVTPDAITLAKALGGGLMPIGAVLCTEEVYTEEFATKHSSTFAGNTLACRAGLAALDLLTRDE  
QALVRHVAETGEYLRQGLLAIQRRHPRVIREVVRGRGFMGLGIQFGVDREAFPGNLLGVMGEQELLTPVIASYLENVEGLRVA  
PTLNGADVIRIEPPLIATRAECDYALAAIERVVELIDRDDTAALLRHVLSFQATTGQAVDRPARHQPALLAVRSREPEEAV  
APSGDPREGRFAFLVHPVDLENYPEFDPSLAAFSRAELEELAGRWNHLLKPFRIGRTRVVSAAGATAYGEFYAVPRTADE  
LAMPQAEAVAEIEEAIEELARENGARIVGLGAYTSVVTRGGLHLRDAGVALTTGNSFTVVAAVEAIAEASRRLGFP  
LGGQTVAVVGATGAI GRATALLLAGEVRRLLVIGNPARPEQSRRLRVAADLARHVLSLAASGRPLGPLAQVLFVEFGG  
WDPPEAEPAEAFLEAWLAAGRCPLVVTDDLAMPQADVVTATSSSTAHLVTPRNVKFGAVVCDLSRPPNVSREVG  
DARPDVLVIDGGVIEVPGRPSMGWNFGFERGLVYACMAETMMLALEHHYRHTSLGADLNLETILWLKDLARQHG  
FRLAELRSFDRPLPAEAWERVLAARSALGTAAR

**Fig. S20. *TsFusion* protein sequence.** The protein sequence of *TsFusion* with a N-terminal His<sub>6</sub>-tag. The start methionine (M) residue is shown in bold. The N-terminal His<sub>6</sub>-tag is highlighted in green; the thrombin peptide sequence is highlighted in turquoise.

### 2.3.2 *TsTAM* protein sequence

**M**GSS **HHHHHH**SSG **LVPRGS****H**MHPFRQYVNPHLAELLEQIQMDKRFVREGECWLWDDQGRRYLDFVAAYGALPFGFNPPEIW  
AALEEARRHRGEPSEFVQPSFLNAAGELARRLIEVAPPGLRYVTFANSGAEAVEAAIKLARAATGRPRI LSTDNGFHGKTFGA  
LSATHRAAYQDAFFAPAEGFDKVPYGDLEALERALAARPGEYAAFLVEPIQEGGGIVVPPPGYLREAREVCCRHHGVLFIA  
EVQTLGRTGVLFACQAEVTPDAITLAKALGGGLMPIGAVLCTEEVYTEEFATKHSSTFAGNTLACRAGLAALDLLTRDE  
QALVRHVAETGEYLRQGLLAIQRRHPRVIREVVRGRGFMGLGIQFGVDREAFPGNLLGVMGEQELLTPVIASYLENVEGLRVA  
PTLNGADVIRIEPPLIATRAECDYALAAIERVVELIDRDDTAALLRHVLS

**Fig. S21. *TsTAM* protein sequence.** The protein sequence of the *TsFusion* N-terminal domain (1-435 aa) (*TsTAM*) with a N-terminal His<sub>6</sub>-tag. The start methionine (M) residue is shown in bold. The N-terminal His<sub>6</sub>-tag is highlighted in green; the thrombin peptide sequence is highlighted in turquoise.

### 2.3.3 *TsDHR* protein sequence

**M**GSS **HHHHHH**SSG **LVPRGS****H**MPQATTGQAVDRPARHQPALLAVRSREPEEAVAPSGDPREGRFAFLVHPVDLENYPEFDPS  
LAAFSRAELEELAGRWNHLLKPFRIGRTRVVSAAGATAYGEFYAVPRTADEFLAMPQAEAVAEIEEAIEELARENGARIVGL  
GAYTSVVTRGGLHLRDAGVALTTGNSFTVVAAVEAIAEASRRLGFP  
LGGQTVAVVGATGAI GRATALLLAGEVRRLLVIGNPARPEQSRRLRVAADLARHVLSLAASGRPLGPLAQVLFVEFGG  
WDPPEAEPAEAFLEAWLAAGRCPLVVTDDLAMPQADVVTATSSSTAHLVTPRNVKFGAVVCDLSRPPNVSREVG  
DARPDVLVIDGGVIEVPGRPSMGWNFGFERGLVYACMAETMMLALEHHYRHTSLGADLNLETILWLKDLARQHG  
FRLAELRSFDRPLPAEAWERVLAARSALGTAAR

**Fig. S22. *TsDHR* protein sequence.** The protein sequence of the *TsFusion* C-terminal domain (436-886 aa) (*TsDHR*) with a N-terminal His<sub>6</sub>-tag. The start methionine (M) residue is shown in bold. The N-terminal His<sub>6</sub>-tag is highlighted in green; the thrombin peptide sequence is highlighted in turquoise.

## 2.4 *Thermincola ferriacetica* Z-0001 Tfer\_2018

### 2.4.1 *TfFusion* protein sequence

**M**GS**S** **HHHHHH**SSG **LVPRGS****H**MKFSSLNPTMDKLFECFKLDVAYVKGEGTYLYDQAGNKYLD<sup>6</sup>DFIAQYGAVPF<sup>6</sup>GYNPPELVAA  
AKKYFDLSLPSMVQPSIPVKAVELAEMLLQLAPGEMAQATFCQSGAEAVEVAIKLARSTGKPKILSTKNSFHGKTMGALS  
ATGRDVYQKPFPTVPVGF<sup>6</sup>FEHIFPGDLDMLLENKMRTEGKQIAAFLVEPIQGE<sup>6</sup>GGIIVPPEGYLKNAEII<sup>6</sup>CRKYGVLLAVDEI  
QTGLGRTGELFACDREGV<sup>6</sup>EPDILLLSKALGGGLVPLGVCLSTRQAWNEEF<sup>6</sup>GRLHSSTFANNFTCAIGLAVLNKLL<sup>6</sup>ENGRQ  
LINNAKSA<sup>6</sup>GNYLLKNLE<sup>6</sup>DIRQYPGVIKEIRGRGLMLGLEFNEFDGSE<sup>6</sup>SFSMKYLAEQGGFSP<sup>6</sup>LLAGYLLNVHKV<sup>6</sup>RVPF<sup>6</sup>L  
NNPMTLRLQPSLT<sup>6</sup>VATVEIDRALHGLER<sup>6</sup>VVKALYYQDHCELYSIIIGKEPGPIRDFRSEKKA<sup>6</sup>VTGSELLPEEK<sup>6</sup>PTEKFAFL  
IHYPSS<sup>6</sup>EDVIKNNP<sup>6</sup>SFKKASKDILEK<sup>6</sup>LIDWEASLDAEPEVIVHLPAIKSKAGKIAEGW<sup>6</sup>LIGIPYSGR<sup>6</sup>HMMEMPRKDA<sup>6</sup>VKVL  
VTALDKAKALGARIVGLGAYTSVVS<sup>6</sup>RGSD<sup>6</sup>LQGGKIAVTS<sup>6</sup>GN<sup>6</sup>SYTIATAFDALIEGARLMGIDPAESTGCVIGATGSIGRV  
CAILLAE<sup>6</sup>EIDKLVLVGNPEKEKTS<sup>6</sup>LRMEQLADEIYTRAFREILAYK<sup>6</sup>GK<sup>6</sup>VAKIKGI<sup>6</sup>AKWLKGF<sup>6</sup>LDRKRKDDPEV<sup>6</sup>WNKLLTA  
LENQGF<sup>6</sup>SINGYI<sup>6</sup>HENLA<sup>6</sup>AKGKYSNPPVKITVNIKQALLQSDLIISASNSTNHLIGPGHLKPGSVICDVARPPDVSEAVLEQ  
RKDVLVIEGGLVQY<sup>6</sup>PDDICFGQNMGYEPGVNMA<sup>6</sup>CLSETM<sup>6</sup>LLALEGTYRDFSIGLKI<sup>6</sup>PVENVY<sup>6</sup>YLR<sup>6</sup>ELAQ<sup>6</sup>RHGFKLATPWNK  
NGGVTPEVARMIKEAALK<sup>6</sup>NENVEKIKTPKSS

**Fig. S23. *TfFusion* protein sequence.** The protein sequence of *TfFusion* with a N-terminal His<sub>6</sub>-tag. The start methionine (M) residue is shown in bold. The N-terminal His<sub>6</sub>-tag is highlighted in green; the thrombin peptide sequence is highlighted in turquoise.

### 2.4.2 *TfTAm* protein sequence

**M**GS**S** **HHHHHH**SSG **LVPRGS****H**MKFSSLNPTMDKLFECFKLDVAYVKGEGTYLYDQAGNKYLD<sup>6</sup>DFIAQYGAVPF<sup>6</sup>GYNPPELVAA  
AKKYFDLSLPSMVQPSIPVKAVELAEMLLQLAPGEMAQATFCQSGAEAVEVAIKLARSTGKPKILSTKNSFHGKTMGALS  
ATGRDVYQKPFPTVPVGF<sup>6</sup>FEHIFPGDLDMLLENKMRTEGKQIAAFLVEPIQGE<sup>6</sup>GGIIVPPEGYLKNAEII<sup>6</sup>CRKYGVLLAVDEI  
QTGLGRTGELFACDREGV<sup>6</sup>EPDILLLSKALGGGLVPLGVCLSTRQAWNEEF<sup>6</sup>GRLHSSTFANNFTCAIGLAVLNKLL<sup>6</sup>ENGRQ  
LINNAKSA<sup>6</sup>GNYLLKNLE<sup>6</sup>DIRQYPGVIKEIRGRGLMLGLEFNEFDGSE<sup>6</sup>SFSMKYLAEQGGFSP<sup>6</sup>LLAGYLLNVHKV<sup>6</sup>RVPF<sup>6</sup>L  
NNPMTLRLQPSLT<sup>6</sup>VATVEIDRALHGLER<sup>6</sup>VVKALYYQDHCELYSIIIG

**Fig. S24. *TfTAm* protein sequence.** The protein sequence of the *TfFusion* N-terminal domain (1-432 aa) (*TfTAm*) with a N-terminal His<sub>6</sub>-tag. The start methionine (M) residue is shown in bold. The N-terminal His<sub>6</sub>-tag is highlighted in green; the thrombin peptide sequence is highlighted in turquoise.

### 2.4.3 *TfDHR* protein sequence

**M**GS**S** **HHHHHH**SSG **LVPRGS****H**MKEPGPIRDFRSEKKA<sup>6</sup>VTGSELLPEEK<sup>6</sup>PTEKFAFLIHYPSS<sup>6</sup>EDVIKNNP<sup>6</sup>SFKKASKDILEK  
LIDWEASLDAEPEVIVHLPAIKSKAGKIAEGW<sup>6</sup>LIGIPYSGR<sup>6</sup>HMMEMPRKDA<sup>6</sup>VKVLVTALDKAKALGARIVGLGAYTSVVS  
GGSDLQGGKIAVTS<sup>6</sup>GN<sup>6</sup>SYTIATAFDALIEGARLMGIDPAESTGCVIGATGSIGRVCAILLAE<sup>6</sup>EIDKLVLVGNPEKEKTS<sup>6</sup>LR  
RMEQLADEIYTRAFREILAYK<sup>6</sup>GK<sup>6</sup>VAKIKGI<sup>6</sup>AKWLKGF<sup>6</sup>LDRKRKDDPEV<sup>6</sup>WNKLLTALENQGF<sup>6</sup>SINGYI<sup>6</sup>HENLA<sup>6</sup>AKGKYSNPP  
VKITVNIKQALLQSDLIISASNSTNHLIGPGHLKPGSVICDVARPPDVSEAVLEQRK<sup>6</sup>DVLVIEGGLVQY<sup>6</sup>PDDICFGQNMGY  
EPGVNMA<sup>6</sup>CLSETM<sup>6</sup>LLALEGTYRDFSIGLKI<sup>6</sup>PVENVY<sup>6</sup>YLR<sup>6</sup>ELAQ<sup>6</sup>RHGFKLATPWNKNGGVTPEVARMIKEAALK<sup>6</sup>NENVEKIK  
TPKSS

**Fig. S25. *TfDHR* protein sequence.** The protein sequence of the *TfFusion* C-terminal domain (433-902 aa) (*TfDHR*) with a N-terminal His<sub>6</sub>-tag. The start methionine (M) residue is shown in bold. The N-terminal His<sub>6</sub>-tag is highlighted in green; the thrombin peptide sequence is highlighted in turquoise.

### 3. References

- 1 S. Sur, T. D. Romo and A. Grossfield, *J. Phys. Chem. B*, 2018, **122**, 2219–2226.
- 2 N. Stankovic, L. Senerovic, T. Ilic-Tomic, B. Vasiljevic and J. Nikodinovic-Runic, *Appl. Microbiol. Biotechnol.*, 2014, **98**, 3841–3858.
- 3 J. Franke, K. Ishida and C. Hertweck, *Angew. Chemie - Int. Ed.*, 2012, **51**, 11611–11615.
- 4 N. Rojas Murcia, X. Lee, P. Waridel, A. Maspoli, H. J. Imker, T. Chai, C. T. Walsh and C. Reimann, *Front. Microbiol.*, 2015, **6**, 170.
- 5 X. Lee, Á. Fox, J. Sufrin, H. Henry, P. Majcherczyk, D. Haas and C. Reimann, *J. Bacteriol.*, 2010, **192**, 4251–4255.
- 6 P. Messner, K. Steiner, K. Zarschler and C. Schäffer, *Carbohydr. Res.*, 2008, **343**, 1934–1951.
- 7 S. Matthies, P. Stallforth and P. H. Seeberger, *J. Am. Chem. Soc.*, 2015, **137**, 2848–2851.
- 8 A. González, M. Rodríguez, A. F. Braña, C. Méndez, J. A. Salas and C. Olano, *Microb. Cell Fact.*, 2016, **15**, 56.
- 9 F. Kudo, Y. Kasama, T. Hirayama and T. Eguchi, *J. Antibiot. (Tokyo)*, 2007, **60**, 492–503.
- 10 J. A. Capra and M. Singh, *Bioinformatics*, 2007, **23**, 1875–82.
- 11 S. Lutz, *Curr. Opin. Biotechnol.*, 2010, **21**, 734–43.
- 12 L. A. Kelley, S. Mezulis, C. M. Yates, M. N. Wass and M. J. E. Sternberg, *Nat. Protoc.*, 2015, **10**, 845–858.
- 13 J. Jumper, R. Evans, A. Pritzel, T. Green, M. Figurnov, O. Ronneberger, K. Tunyasuvunakool, R. Bates, A. Žídek, A. Potapenko, A. Bridgland, C. Meyer, S. A. A. Kohl, A. J. Ballard, A. Cowie, B. Romera-Paredes, S. Nikolov, R. Jain, J. Adler, T. Back, S. Petersen, D. Reiman, E. Clancy, M. Zielinski, M. Steinegger, M. Pacholska, T. Berghammer, S. Bodenstein, D. Silver, O. Vinyals, A. W. Senior, K. Kavukcuoglu, P. Kohli and D. Hassabis, *Nature*, 2021, **596**, 583–589.
- 14 M. Varadi, S. Anyango, M. Deshpande, S. Nair, C. Natassia, G. Yordanova, D. Yuan, O. Stroe, G. Wood, A. Laydon, A. Žídek, T. Green, K. Tunyasuvunakool, S. Petersen, J. Jumper, E. Clancy, R. Green, A. Vora, M. Lutfi, M. Figurnov, A. Cowie, N. Hobbs, P. Kohli, G. Kleywegt, E. Birney, D. Hassabis and S. Velankar, *Nucleic Acids Res.*, 2022, **50**, D439–D444.
- 15 A. Rath, M. Glibowicka, V. G. Nadeau, G. Chen and C. M. Deber, *Proc. Natl. Acad. Sci. U. S. A.*, 2009, **106**, 1760–1765.
- 16 S. Prasad, P. B. Khadare and I. Roy, *Appl. Environ. Microbiol.*, 2011, **77**, 4603–4609.
